# Supplementary material for: No Association between the Mitochondrial Genome and Prostate Cancer Risk: The Multiethnic Cohort
Source: Oxford University Press journal article supplement (doi:10.1158/1055-9965.epi-16-0111), 2016-03-28
Supplement: 10559965epi160111-sup-161692_0_supp_3335485_w1vqy5.xlsx [file 10559965epi160111-sup-161692_0_supp_3335485_w1vqy5.xlsx]

## Sheet: Suppl. Table 1
Table S1. Association between 350 mtSNPs and prostate cancer risk overall and by self-reported race/ethnicity
mtSNP	position	All (cases/controls=4,086/3,698)								African Americans (cases/controls = 1,004/1,003)							Asian Americans (cases/controls = 1,009/999)							European American (cases/controls =836/825)							Latinos (cases/controls =1,099/739)							Native Hawaiin (cases/controls =138/132)
		locus	Minor allele	MAF controls	OR	95% C.I.	P*	q**		Minor allele	MAF controls	OR	95% C.I.	P*	q**		Minor allele	MAF controls	OR	95% C.I.	P*	q**		Minor allele	MAF controls	OR	95% C.I.	P*	q**		Minor allele	MAF controls	OR	95% C.I.	P*	q**		Minor allele	MAF controls	OR	95% C.I.	P*	q**
mt217	217	control region	C	0.00295516	0.9972	(0.81,1.2)	0.978757	0.996492		C	0.000498504	--	--	--	--		C	0.00199203	1.0033	(0.61,1.6)	0.989601	0.998511		C	0.00782661	1.1166	(0.85,1.5)	0.427314	0.99477		C	0.00272035	0.6631	(0.43,1)	0.0615973	0.709667		C	0	--	--	--	--
mt228	228	control region	A	0.0191936	1.0025	(0.92,1.1)	0.952248	0.996492		A	0.00399202	0.8035	(0.57,1.1)	0.217172	0.99502		A	0.0079721	1.0578	(0.83,1.4)	0.655342	0.948234		A	0.0446321	0.9811	(0.87,1.1)	0.74871	0.99477		A	0.0273973	1.0442	(0.91,1.2)	0.538361	0.99705		A	0.00371747	--	--	--	--
mt285	285	control region	T	0.000516729	--	--	--	--		T	0	--	--	--	--		T	0	--	--	--	--		T	0.00241546	1.2846	(0.79,2.1)	0.31618	0.99477		T	0	--	--	--	--		T	0	--	--	--	--
mt295	295	control region	T	0.0193374	0.9532	(0.88,1)	0.255576	0.823125		T	0.00302115	1.018	(0.68,1.5)	0.930346	0.99502		T	0.000498256	--	--	--	--		T	0.0790109	0.9673	(0.88,1.1)	0.464833	0.99477		T	0.00653595	0.7596	(0.57,1)	0.0533607	0.709667		T	0	--	--	--	--
mt418	418	control region	T	0.00773794	0.8977	(0.79,1)	0.0978479	0.784303		T	0.0290145	0.8971	(0.79,1)	0.102946	0.980792		T	0	--	--	--	--		T	0	--	--	--	--		T	0.0010989	0.9307	(0.47,1.8)	0.836428	0.99705		T	0	--	--	--	--
mt489	489	control region	C	0.256921	1.0259	(0.99,1.1)	0.108711	0.784303		C	0.02002	1.0399	(0.89,1.2)	0.624728	0.99502		T	0.661662	1.0208	(0.97,1.1)	0.386926	0.899149		C	0.0928398	0.9934	(0.91,1.1)	0.876784	0.99477		C	0.255916	1.0467	(0.99,1.1)	0.0840431	0.709667		C	0.0223048	1.0219	(0.67,1.6)	0.919728	0.94384
mt606	606	tRNA	G	0.000903576	--	--	--	--		G	0.00250752	1.2923	(0.83,2)	0.252091	0.99502		G	0	--	--	--	--		G	0.00060241	--	--	--	--		G	0.000546747	0.5554	(0.21,1.5)	0.231838	0.908969		G	0	--	--	--	--
mt629	629	tRNA	C	0.00115726	--	--	--	--		C	0.00399202	1.1451	(0.81,1.6)	0.444662	0.99502		C	0	--	--	--	--		C	0	--	--	--	--		C	0.000544662	--	--	--	--		C	0	--	--	--	--
mt663	663	rRNA	G	0.101876	1.0009	(0.96,1)	0.965058	0.996492		G	0.00548082	1.1566	(0.86,1.6)	0.337175	0.99502		G	0.0587649	1.0243	(0.93,1.1)	0.613937	0.948234		G	0.0168573	1.0323	(0.84,1.3)	0.759238	0.99477		G	0.346028	0.988	(0.94,1)	0.617612	0.99705		--	0	--	--	--	--
mt709	709	rRNA	A	0.130804	1.0035	(0.97,1)	0.835507	0.983006		A	0.166916	1.0441	(0.98,1.1)	0.148976	0.980792		A	0.167996	1.0166	(0.96,1.1)	0.581313	0.948234		A	0.163253	0.9287	(0.87,0.99)	0.0260791	0.99477		A	0.0393013	1.027	(0.91,1.2)	0.652321	0.99705		A	0.00740741	--	--	--	--
mt710	710	rRNA	C	0.0258921	1.0476	(0.98,1.1)	0.203894	0.809463		C	0.0895372	1.0641	(0.99,1.1)	0.113771	0.980792		C	0.000996512	0.9966	(0.5,2)	0.992428	0.998511		C	0.00541842	0.9497	(0.68,1.3)	0.758471	0.99477		C	0.00653239	0.9045	(0.68,1.2)	0.481075	0.990359		C	0	--	--	--	--
mt769	769	rRNA	A	0.155447	0.9892	(0.95,1)	0.599103	0.959942		G	0.559043	0.9899	(0.95,1)	0.650985	0.99502		A	0.000498008	--	--	--	--		A	0.0150512	0.9584	(0.78,1.2)	0.690381	0.99477		A	0.0331882	0.9754	(0.86,1.1)	0.697562	0.99705		A	0.0037037	--	--	--	--
mt825	825	rRNA	A	0.0680884	0.9928	(0.95,1)	0.767982	0.959942		A	0.246139	0.9919	(0.94,1)	0.755337	0.99502		--	0	--	--	--	--		A	0.00662252	0.945	(0.7,1.3)	0.712718	0.99477		A	0.0136017	1.0026	(0.83,1.2)	0.97908	0.99705		--	0	--	--	--	--
mt827	827	rRNA	G	0.0726314	0.9548	(0.91,1)	0.046644	0.784303		G	0.00348779	1.0649	(0.74,1.5)	0.739657	0.99502		G	0.0558047	0.9232	(0.84,1)	0.100808	0.857932		G	0.01207	0.932	(0.74,1.2)	0.556	0.99477		G	0.231774	0.9637	(0.91,1)	0.173806	0.837285		--	0	--	--	--	--
mt921	921	rRNA	C	0.0169928	0.9693	(0.89,1.1)	0.48537	0.949766		C	0.060289	0.9729	(0.89,1.1)	0.558289	0.99502		C	0	--	--	--	--		C	0.00121433	0.9828	(0.49,2)	0.9608	0.99477		C	0.00489929	0.964	(0.7,1.3)	0.823141	0.99705		C	0	--	--	--	--
mt930	930	rRNA	A	0.0140067	0.9715	(0.88,1.1)	0.552713	0.959942		A	0.00847035	0.9781	(0.77,1.2)	0.855732	0.99502		A	0.00199302	0.7703	(0.47,1.3)	0.303791	0.857932		A	0.0518072	0.9836	(0.88,1.1)	0.765342	0.99477		A	0.00108814	0.9102	(0.46,1.8)	0.786607	0.99705		--	0	--	--	--	--
mt951	951	rRNA	A	0.00154262	0.9903	(0.75,1.3)	0.94592	0.996492		A	0	--	--	--	--		A	0	--	--	--	--		A	0.00662252	0.9595	(0.71,1.3)	0.784185	0.99477		A	0.000544366	--	--	--	--		A	0	--	--	--	--
mt961	961	rRNA	C	0.0198377	0.9569	(0.88,1)	0.28154	0.826373		C	0.00450902	0.8441	(0.61,1.2)	0.310078	0.99502		C	0.0523691	0.9332	(0.85,1)	0.168293	0.857932		C	0.015691	1.076	(0.89,1.3)	0.45803	0.99477		C	0.00653951	0.9813	(0.74,1.3)	0.894673	0.99705		C	0.00740741	0.9687	(0.48,2)	0.929205	0.94384
mt1005	1005	rRNA	C	0.00374968	1.0997	(0.92,1.3)	0.306817	0.865275		C	0	--	--	--	--		C	0.0114656	1.1107	(0.9,1.4)	0.318237	0.857932		C	0	--	--	--	--		C	0.00332963	1.0758	(0.73,1.6)	0.715756	0.99705		C	0	--	--	--	--
mt1018	1018	rRNA	A	0.157888	0.9888	(0.95,1)	0.579292	0.959942		G	0.557549	0.9889	(0.95,1)	0.61972	0.99502		--	0	--	--	--	--		A	0.0162553	1.0019	(0.82,1.2)	0.984986	0.99477		A	0.0446137	0.9736	(0.87,1.1)	0.629562	0.99705		A	0.0037037	--	--	--	--
mt1048	1048	rRNA	T	0.0164567	0.9419	(0.86,1)	0.182747	0.809463		T	0.0493766	0.9367	(0.85,1)	0.204606	0.99502		T	0.0114713	0.9741	(0.79,1.2)	0.80255	0.979737		T	0.000602047	0.5681	(0.21,1.5)	0.25931	0.99477		T	0.00272183	0.9831	(0.64,1.5)	0.938249	0.99705		T	0	--	--	--	--
mt1185	1185	rRNA	T	0.0111782	0.9752	(0.86,1.1)	0.695497	0.959942		--	0	--	--	--	--		--	0	--	--	--	--		T	0.00120482	0.9784	(0.49,2)	0.951067	0.99477		--	0	--	--	--	--		T	0.314815	0.9624	(0.85,1.1)	0.559431	0.82944
mt1243	1243	rRNA	C	0.00565407	0.8823	(0.76,1)	0.0986467	0.784303		C	0.000996512	0.6301	(0.31,1.3)	0.19185	0.99502		C	0.000498256	--	--	--	--		C	0.0228916	0.8886	(0.76,1)	0.14986	0.99477		C	0.00163221	0.7829	(0.45,1.4)	0.388275	0.948711		C	0	--	--	--	--
mt1382	1382	rRNA	C	0.0179856	0.9523	(0.87,1)	0.262602	0.824207		--	0	--	--	--	--		C	0.0692231	0.9573	(0.88,1)	0.322543	0.857932		C	0.000602047	0.6391	(0.24,1.7)	0.372649	0.99477		--	0	--	--	--	--		--	0	--	--	--	--
mt1393	1393	rRNA	A	0.00102934	1.0007	(0.71,1.4)	0.996808	0.999506		A	0.00149477	0.8469	(0.48,1.5)	0.565073	0.99502		A	0	--	--	--	--		A	0.00301205	1.1058	(0.71,1.7)	0.652933	0.99477		A	0	--	--	--	--		A	0	--	--	--	--
mt1406	1406	rRNA	C	0.00179856	0.7432	(0.57,0.97)	0.0261415	0.784303		C	0.000996512	0.6301	(0.31,1.3)	0.19185	0.99502		C	0	--	--	--	--		C	0.00662252	0.7864	(0.58,1.1)	0.11186	0.99477		C	0.00054407	0.5667	(0.22,1.5)	0.247427	0.908969		C	0	--	--	--	--
mt1413	1413	rRNA	C	0.000385703	--	--	--	--		C	0.000996512	0.607	(0.3,1.2)	0.157647	0.980792		C	0.000499002	--	--	--	--		C	0	--	--	--	--		C	0	--	--	--	--		C	0	--	--	--	--
mt1438	1438	rRNA	A	0.0343011	1.0373	(0.97,1.1)	0.247823	0.818332		A	0.0951669	1.065	(0.99,1.1)	0.0977368	0.980792		A	0.0064741	1.031	(0.78,1.4)	0.826596	0.985275		A	0.025286	0.9896	(0.85,1.2)	0.893708	0.99477		A	0.0114255	0.9237	(0.75,1.1)	0.462417	0.990359		--	0	--	--	--	--
mt1442	1442	rRNA	A	0.033299	0.9945	(0.93,1.1)	0.864403	0.99528		A	0.0963555	0.9836	(0.91,1.1)	0.661863	0.99502		A	0.0254237	1.0285	(0.89,1.2)	0.692835	0.954184		A	0.00120409	1.0251	(0.51,2.1)	0.94438	0.99477		A	0.00652884	1.0015	(0.76,1.3)	0.991751	0.99705		A	0.0037037	--	--	--	--
mt1598	1598	rRNA	A	0.0156792	0.9795	(0.9,1.1)	0.65022	0.959942		A	0.00199402	0.7664	(0.47,1.3)	0.287351	0.99502		A	0.0323866	0.9865	(0.87,1.1)	0.829666	0.985275		A	0.00662252	1.0348	(0.77,1.4)	0.821214	0.99477		A	0.0228634	0.9711	(0.84,1.1)	0.702443	0.99705		--	0	--	--	--	--
mt1664	1664	rRNA	A	0.00308483	0.9369	(0.77,1.1)	0.522448	0.959942		A	0.00299103	1.1466	(0.77,1.7)	0.503606	0.99502		A	0.00647733	0.9632	(0.73,1.3)	0.787686	0.979737		A	0	--	--	--	--		A	0.00272183	0.6546	(0.43,1)	0.0543186	0.709667		A	0	--	--	--	--
mt1692	1692	rRNA	G	0.0128667	1.0304	(0.91,1.2)	0.626299	0.959942		--	0	--	--	--	--		G	0.000997506	0.9778	(0.49,2)	0.949744	0.998511		G	0.001207	1.0385	(0.52,2.1)	0.915223	0.99477		--	0	--	--	--	--		G	0.358209	1.0443	(0.92,1.2)	0.497482	0.82944
mt1694	1694	rRNA	C	0.00115696	1.0439	(0.75,1.4)	0.796253	0.960381		C	0.00399003	0.9927	(0.7,1.4)	0.96708	0.99502		C	0	--	--	--	--		C	0	--	--	--	--		C	0.00054407	--	--	--	--		C	0	--	--	--	--
mt1700	1700	rRNA	C	0.00386051	0.8735	(0.73,1)	0.139448	0.809463		C	0.00249501	0.9179	(0.59,1.4)	0.702122	0.99502		C	0	--	--	--	--		C	0.0151423	0.8685	(0.71,1.1)	0.161358	0.99477		C	0	--	--	--	--		C	0	--	--	--	--
mt1703	1703	rRNA	T	0.00154162	0.9922	(0.75,1.3)	0.956539	0.996492		T	0.000996512	--	--	--	--		T	0	--	--	--	--		T	0.00602047	0.9799	(0.72,1.3)	0.898139	0.99477		T	0	--	--	--	--		T	0	--	--	--	--
mt1706	1706	rRNA	T	0.0133625	0.9181	(0.83,1)	0.0877906	0.784303		T	0.0498256	0.9177	(0.83,1)	0.0939497	0.980792		--	0	--	--	--	--		T	0.00060241	--	--	--	--		T	0.00163221	0.7685	(0.44,1.3)	0.353856	0.944833		--	0	--	--	--	--
mt1709	1709	rRNA	A	0.00579225	0.9575	(0.83,1.1)	0.560342	0.959942		A	0.00450902	1.0528	(0.76,1.5)	0.758183	0.99502		A	0.00896414	0.9356	(0.74,1.2)	0.57522	0.948234		A	0.00240964	0.9656	(0.59,1.6)	0.889009	0.99477		A	0.00708447	0.8679	(0.66,1.1)	0.300737	0.944833		A	0.0037037	--	--	--	--
mt1717	1717	rRNA	C	0.00192852	1.0318	(0.8,1.3)	0.807922	0.966458		C	0.000499251	0.5871	(0.22,1.6)	0.286745	0.99502		C	0.000498008	0.6075	(0.23,1.6)	0.319934	0.857932		C	0.00120482	--	--	--	--		C	0.00598802	1.0404	(0.78,1.4)	0.789837	0.99705		C	0	--	--	--	--
mt1719	1719	rRNA	A	0.0191443	0.9878	(0.91,1.1)	0.767772	0.959942		A	0.0219342	1.0005	(0.86,1.2)	0.99502	0.99502		A	0.0064741	1.0289	(0.78,1.4)	0.838532	0.985275		A	0.0499699	0.9609	(0.86,1.1)	0.478175	0.99477		A	0.00489663	1.0664	(0.77,1.5)	0.69519	0.99705		--	0	--	--	--	--
mt1736	1736	rRNA	G	0.100644	1.0019	(0.96,1)	0.930006	0.996492		G	0.00549451	1.1557	(0.86,1.6)	0.339776	0.99502		G	0.0572709	1.0395	(0.95,1.1)	0.421212	0.923416		G	0.0168573	1.0323	(0.84,1.3)	0.759238	0.99477		G	0.343357	0.9855	(0.94,1)	0.547475	0.99705		--	0	--	--	--	--
mt1738	1738	rRNA	C	0.0263361	1.0344	(0.96,1.1)	0.351014	0.912062		C	0.0886896	1.0597	(0.98,1.1)	0.139714	0.980792		--	0	--	--	--	--		C	0.00541842	0.9569	(0.69,1.3)	0.79302	0.99477		C	0.00979325	0.8589	(0.68,1.1)	0.190733	0.837285		--	0	--	--	--	--
mt1811	1811	rRNA	G	0.0354573	1.0266	(0.96,1.1)	0.411933	0.923297		G	0.00498256	0.9124	(0.67,1.2)	0.563267	0.99502		--	0	--	--	--	--		G	0.140277	1.0299	(0.96,1.1)	0.403898	0.99477		G	0.0179543	1.0677	(0.9,1.3)	0.448549	0.990359		--	0	--	--	--	--
mt1842	1842	rRNA	G	0.00128601	--	--	--	--		G	0.000997506	--	--	--	--		G	0.000498256	--	--	--	--		G	0.000603865	--	--	--	--		G	0.00326442	1.2594	(0.85,1.9)	0.250385	0.908969		G	0	--	--	--	--
mt1888	1888	rRNA	A	0.0443274	0.9823	(0.93,1)	0.524116	0.959942		A	0.00947158	1.0465	(0.83,1.3)	0.693707	0.99502		A	0.00199203	1.2872	(0.78,2.1)	0.320133	0.857932		A	0.0963275	0.9503	(0.88,1)	0.220936	0.99477		A	0.0881393	0.9977	(0.92,1.1)	0.953938	0.99705		--	0	--	--	--	--
mt2056	2056	rRNA	A	0.000899396	0.8825	(0.61,1.3)	0.50724	0.957114		A	0.000997009	0.5826	(0.29,1.2)	0.126938	0.980792		A	0.000498008	--	--	--	--		A	0	--	--	--	--		A	0.00217628	0.9225	(0.57,1.5)	0.742925	0.99705		A	0	--	--	--	--
mt2092	2092	rRNA	T	0.018397	1.0374	(0.95,1.1)	0.394324	0.923297		T	0.00298954	--	--	--	--		--	0	--	--	--	--		T	0.00362757	1.2124	(0.8,1.8)	0.357696	0.99477		T	0.0713508	1.0206	(0.94,1.1)	0.647029	0.99705		--	0	--	--	--	--
mt2218	2218	rRNA	T	0.000515265	--	--	--	--		T	0	--	--	--	--		T	0	--	--	--	--		T	0.00240964	1.2843	(0.79,2.1)	0.316505	0.99477		T	0	--	--	--	--		T	0	--	--	--	--
mt2259	2259	rRNA	T	0.00334147	1.08	(0.89,1.3)	0.433332	0.923297		T	0.00199302	1.0354	(0.63,1.7)	0.889589	0.99502		T	0	--	--	--	--		T	0.013253	1.0918	(0.88,1.3)	0.412725	0.99477		T	0	--	--	--	--		T	0	--	--	--	--
mt2283	2283	rRNA	T	0.00308523	1.0842	(0.89,1.3)	0.428821	0.923297		T	0.0104686	1.0289	(0.83,1.3)	0.794683	0.99502		T	0.000498504	--	--	--	--		T	0.000602047	--	--	--	--		T	0.000544662	--	--	--	--		T	0	--	--	--	--
mt2332	2332	rRNA	T	0.0294231	0.9907	(0.93,1.1)	0.787107	0.959942		T	0.107178	0.9897	(0.92,1.1)	0.773974	0.99502		--	0	--	--	--	--		T	0.00240819	0.9851	(0.6,1.6)	0.953184	0.99477		T	0.00489663	0.9681	(0.7,1.3)	0.844301	0.99705		T	0.0037037	--	--	--	--
mt2352	2352	rRNA	C	0.0739979	1.0206	(0.97,1.1)	0.395252	0.923297		C	0.266069	1.0161	(0.97,1.1)	0.527933	0.99502		--	0	--	--	--	--		C	0.0102348	1.1615	(0.91,1.5)	0.226305	0.99477		C	0.0136017	0.9895	(0.81,1.2)	0.915342	0.99705		--	0	--	--	--	--
mt2358	2358	rRNA	G	0.013251	0.9134	(0.83,1)	0.0718809	0.784303		G	0.0500751	0.9187	(0.83,1)	0.0983112	0.980792		G	0	--	--	--	--		G	0	--	--	--	--		G	0.00163221	0.7685	(0.44,1.3)	0.353856	0.944833		G	0	--	--	--	--
mt2416	2416	rRNA	C	0.0992033	0.9977	(0.96,1)	0.914717	0.996492		C	0.307731	0.9963	(0.95,1)	0.876571	0.99502		C	0.00249004	0.7312	(0.47,1.1)	0.163183	0.857932		C	0.0102348	1.0145	(0.79,1.3)	0.909528	0.99477		C	0.0184984	0.9907	(0.84,1.2)	0.912852	0.99705		C	0.366667	1.0546	(0.93,1.2)	0.401869	0.82944
mt2626	2626	rRNA	C	0.0397121	1.0027	(0.94,1.1)	0.930476	0.996492		C	0.00149477	0.8424	(0.48,1.5)	0.55246	0.99502		C	0.149402	1.0002	(0.94,1.1)	0.994423	0.998511		C	0.00180832	--	--	--	--		C	0.00108873	0.5371	(0.27,1.1)	0.0734463	0.709667		C	0.0037037	--	--	--	--
mt2706	2706	rRNA	A	0.106886	1.0266	(0.98,1.1)	0.22145	0.809463		A	0.0109616	0.9254	(0.75,1.1)	0.47014	0.99502		A	0.00747012	1.1826	(0.92,1.5)	0.19698	0.857932		A	0.410596	1.0422	(0.99,1.1)	0.0999098	0.99477		A	0.0593036	0.9637	(0.88,1.1)	0.451762	0.990359		A	0.0148148	1.0207	(0.62,1.7)	0.935218	0.94384
mt2758	2758	rRNA	A	0.0677117	0.9914	(0.94,1)	0.728246	0.959942		A	0.245264	0.9919	(0.94,1)	0.752928	0.99502		--	0	--	--	--	--		A	0.00662252	0.945	(0.7,1.3)	0.712718	0.99477		A	0.0130577	0.9862	(0.81,1.2)	0.890797	0.99705		--	0	--	--	--	--
mt2768	2768	rRNA	G	0.0248136	1.0418	(0.97,1.1)	0.273787	0.826373		G	0.0876931	1.053	(0.97,1.1)	0.190033	0.99502		--	0	--	--	--	--		G	0.00481638	1.0129	(0.71,1.4)	0.942821	0.99477		G	0.00489663	0.8556	(0.62,1.2)	0.342268	0.944833		--	0	--	--	--	--
mt2772	2772	rRNA	T	0.0385455	1.0016	(0.94,1.1)	0.959715	0.996492		T	0.000498504	--	--	--	--		T	0.14741	1.0003	(0.94,1.1)	0.992127	0.998511		T	0.00120409	0.9896	(0.5,2)	0.976474	0.99477		--	0	--	--	--	--		T	0.0037037	--	--	--	--
mt2789	2789	rRNA	T	0.0547554	0.9866	(0.94,1)	0.614122	0.959942		T	0.196177	0.988	(0.93,1)	0.669001	0.99502		--	0	--	--	--	--		T	0.00485437	0.9544	(0.67,1.4)	0.797194	0.99477		T	0.0131941	0.983	(0.81,1.2)	0.864808	0.99705		--	0	--	--	--	--
mt2831	2831	rRNA	A	0.0100528	0.8871	(0.79,0.99)	0.0366091	0.784303		A	0.00348953	1.268	(0.87,1.8)	0.210712	0.99502		A	0.0351229	0.8467	(0.75,0.95)	0.00630986	0.819485		A	0.00060241	--	--	--	--		A	0	--	--	--	--		A	0	--	--	--	--
mt2885	2885	rRNA	C	0.0682256	0.9961	(0.95,1)	0.873592	0.99528		C	0.24676	0.9954	(0.95,1)	0.860336	0.99502		--	0	--	--	--	--		C	0.00662252	0.945	(0.7,1.3)	0.712718	0.99477		C	0.0136017	1.0026	(0.83,1.2)	0.97908	0.99705		--	0	--	--	--	--
mt3010	3010	rRNA	A	0.168551	1.0119	(0.98,1)	0.454419	0.923297		A	0.0453413	0.9653	(0.87,1.1)	0.51013	0.99502		A	0.308765	1.0125	(0.97,1.1)	0.608561	0.948234		A	0.238411	1.0229	(0.97,1.1)	0.431863	0.99477		A	0.110446	1.0109	(0.94,1.1)	0.766212	0.99705		A	0.00740741	--	--	--	--
mt3027	3027	rRNA	C	0.00295554	0.9792	(0.8,1.2)	0.83956	0.983006		C	0.00398804	1.1415	(0.81,1.6)	0.454778	0.99502		C	0.00149402	1.2016	(0.68,2.1)	0.52633	0.948234		C	0.00120482	1.0614	(0.53,2.1)	0.867385	0.99477		C	0.0054407	0.8116	(0.6,1.1)	0.18062	0.837285		C	0	--	--	--	--
mt3116	3116	rRNA	T	0.000642756	--	--	--	--		T	0	--	--	--	--		T	0	--	--	--	--		T	0.00301023	1.0724	(0.69,1.7)	0.754956	0.99477		T	0	--	--	--	--		T	0	--	--	--	--
mt3197	3197	rRNA	C	0.0210797	0.985	(0.91,1.1)	0.706332	0.959942		C	0.00149551	0.8006	(0.45,1.4)	0.441996	0.99502		C	0	--	--	--	--		C	0.0771549	1.0021	(0.92,1.1)	0.963476	0.99477		C	0.0168753	0.9842	(0.83,1.2)	0.85808	0.99705		C	0.00740741	0.5732	(0.28,1.2)	0.120991	0.82944
mt3200	3200	rRNA	A	0.0127282	1.0724	(0.97,1.2)	0.171492	0.809463		A	0.0444334	1.0763	(0.97,1.2)	0.175062	0.99502		A	0.000498256	0.6032	(0.23,1.6)	0.313915	0.857932		A	0.00120482	1.0252	(0.51,2.1)	0.944162	0.99477		A	0.00326442	1.088	(0.73,1.6)	0.675938	0.99705		A	0.0037037	--	--	--	--
mt3206	3206	rRNA	T	0.0180785	0.9458	(0.87,1)	0.201248	0.809463		T	0.00050226	0.6012	(0.23,1.6)	0.308871	0.99502		T	0.0690691	0.9419	(0.86,1)	0.175703	0.857932		T	0.000604595	--	--	--	--		T	0	--	--	--	--		T	0	--	--	--	--
mt3308	3308	ND1	C	0.0266204	1.0497	(0.98,1.1)	0.179569	0.809463		C	0.0928144	1.0512	(0.97,1.1)	0.19427	0.99502		C	0.000498008	--	--	--	--		C	0.00542169	1.0791	(0.78,1.5)	0.650662	0.99477		C	0.00599782	0.9435	(0.71,1.3)	0.695566	0.99705		--	0	--	--	--	--
mt3316	3316	ND1	A	0.00720072	1.0811	(0.95,1.2)	0.243666	0.818332		A	0.00249377	--	--	--	--		A	0.0134663	1.1358	(0.94,1.4)	0.189747	0.857932		A	0.00482218	0.7723	(0.55,1.1)	0.143935	0.99477		A	0.00870511	1.0938	(0.86,1.4)	0.466958	0.990359		A	0	--	--	--	--
mt3338	3338	ND1	C	0.00154242	1.0658	(0.8,1.4)	0.658129	0.959942		C	0.000997009	--	--	--	--		C	0.00249004	0.9073	(0.58,1.4)	0.664605	0.948234		C	0.00180723	1.1626	(0.66,2)	0.602055	0.99477		C	0.00108932	--	--	--	--		C	0	--	--	--	--
mt3394	3394	ND1	C	0.00943518	0.9535	(0.85,1.1)	0.417967	0.923297		C	0.00149701	0.6208	(0.35,1.1)	0.0987992	0.980792		C	0.0243531	0.9572	(0.83,1.1)	0.55001	0.948234		C	0.00662651	1.1439	(0.85,1.5)	0.37341	0.99477		C	0.00545851	0.8989	(0.66,1.2)	0.493421	0.990359		C	0.0037037	0.5902	(0.22,1.6)	0.295064	0.82944
mt3398	3398	ND1	C	0.00353449	0.8704	(0.72,1.1)	0.151578	0.809463		C	0.00157978	0.8213	(0.47,1.4)	0.496282	0.99502		C	0.00249875	0.7413	(0.48,1.2)	0.182285	0.857932		C	0.00423729	0.8354	(0.58,1.2)	0.343096	0.99477		C	0.000550358	--	--	--	--		C	0.0407407	0.9385	(0.69,1.3)	0.683495	0.841225
mt3434	3434	ND1	G	0.00555484	1.0698	(0.92,1.2)	0.376765	0.923297		G	0.0136226	0.9829	(0.81,1.2)	0.858381	0.99502		G	0.00249377	1.3431	(0.87,2.1)	0.188442	0.857932		G	0.0030175	1.0953	(0.7,1.7)	0.686293	0.99477		G	0.00328407	1.2501	(0.84,1.9)	0.266034	0.943874		G	0	--	--	--	--
mt3450	3450	ND1	T	0.0213862	1.0038	(0.93,1.1)	0.925515	0.996492		T	0.0747242	0.9795	(0.9,1.1)	0.627252	0.99502		--	0	--	--	--	--		T	0.00302297	0.8355	(0.54,1.3)	0.428699	0.99477		T	0.00652884	1.384	(1,1.8)	0.0236132	0.709667		--	0	--	--	--	--
mt3480	3480	ND1	G	0.0251799	1.0293	(0.96,1.1)	0.438066	0.923297		G	0.00298954	0.9945	(0.67,1.5)	0.978661	0.99502		G	0.000498008	0.6047	(0.23,1.6)	0.316801	0.857932		G	0.0993377	1.0303	(0.95,1.1)	0.466724	0.99477		G	0.0130577	1.0736	(0.88,1.3)	0.48223	0.990359		--	0	--	--	--	--
mt3497	3497	ND1	T	0.00931195	1.0872	(0.97,1.2)	0.161683	0.809463		T	0	--	--	--	--		T	0.0357863	1.1003	(0.98,1.2)	0.114675	0.857932		T	0.000602047	0.6254	(0.23,1.7)	0.355289	0.99477		T	0	--	--	--	--		T	0	--	--	--	--
mt3547	3547	ND1	G	0.0583323	0.9559	(0.91,1)	0.089452	0.784303		G	0.00149477	--	--	--	--		--	0	--	--	--	--		G	0.013245	0.8802	(0.71,1.1)	0.25677	0.99477		G	0.233406	0.9585	(0.91,1)	0.118404	0.730161		--	0	--	--	--	--
mt3594	3594	ND1	T	0.153233	0.9915	(0.95,1)	0.681661	0.959942		C	0.552395	0.9912	(0.95,1)	0.693964	0.99502		T	0.000498256	0.6191	(0.23,1.7)	0.338858	0.857932		T	0.0144578	0.9798	(0.79,1.2)	0.851833	0.99477		T	0.0321001	0.9957	(0.88,1.1)	0.947057	0.99705		T	0.0037037	--	--	--	--
mt3736	3736	ND1	A	0.000900553	--	--	--	--		A	0.00149701	0.8499	(0.48,1.5)	0.573448	0.99502		A	0.000997009	0.98	(0.49,2)	0.95482	0.998511		A	0	--	--	--	--		A	0.00108873	--	--	--	--		A	0	--	--	--	--
mt3746	3746	ND1	T	0	--	--	--	--		T	0	--	--	--	--		T	0	--	--	--	--		T	0	--	--	--	--		T	0	--	--	--	--		T	0	--	--	--	--
mt3866	3866	ND1	C	0.0075816	0.9501	(0.84,1.1)	0.435396	0.923297		C	0.0274041	0.9305	(0.81,1.1)	0.291954	0.99502		C	0.000498256	0.5963	(0.22,1.6)	0.302057	0.857932		C	0	--	--	--	--		C	0.0016331	--	--	--	--		C	0	--	--	--	--
mt3918	3918	ND1	A	0.0226192	0.9785	(0.91,1.1)	0.574762	0.959942		A	0.0747384	0.9864	(0.91,1.1)	0.746119	0.99502		A	0.000498008	0.6052	(0.23,1.6)	0.316081	0.857932		A	0.00542169	1.0534	(0.76,1.5)	0.755718	0.99477		A	0.00816993	0.883	(0.69,1.1)	0.328647	0.944833		A	0.0037037	--	--	--	--
mt3927	3927	ND1	G	0.00192753	0.9473	(0.74,1.2)	0.674099	0.959942		G	0.00548082	0.9561	(0.71,1.3)	0.76639	0.99502		--	0	--	--	--	--		G	0.00060241	0.547	(0.2,1.5)	0.234411	0.99477		G	0.0016331	1.0392	(0.6,1.8)	0.892313	0.99705		--	0	--	--	--	--
mt4021	4021	ND1	G	0.000257732	--	--	--	--		G	0	--	--	--	--		G	0	--	--	--	--		G	0.00121803	0.621	(0.31,1.2)	0.178647	0.99477		G	0	--	--	--	--		G	0	--	--	--	--
mt4093	4093	ND1	G	0.000128667	--	--	--	--		G	0	--	--	--	--		G	0.0004995	--	--	--	--		G	0	--	--	--	--		G	0	--	--	--	--		G	0	--	--	--	--
mt4104	4104	ND1	G	0.155463	0.991	(0.95,1)	0.659211	0.959942		A	0.551122	0.9906	(0.95,1)	0.675248	0.99502		G	0.00361757	0.9221	(0.64,1.3)	0.669301	0.948234		G	0.0156532	0.9787	(0.8,1.2)	0.837071	0.99477		G	0.0321526	0.9947	(0.88,1.1)	0.934338	0.99705		G	0.0037037	--	--	--	--
mt4123	4123	ND1	G	0.00141424	--	--	--	--		G	0.000996512	--	--	--	--		G	0	--	--	--	--		G	0.000602047	0.6117	(0.23,1.6)	0.326483	0.99477		G	0.00436681	1.1793	(0.84,1.7)	0.343284	0.944833		G	0	--	--	--	--
mt4129	4129	ND1	G	0.00167009	0.9108	(0.69,1.2)	0.499786	0.957114		G	0	--	--	--	--		G	0.00149402	0.837	(0.47,1.5)	0.539129	0.948234		G	0.00120409	0.6027	(0.3,1.2)	0.151631	0.99477		G	0.00435256	1.0298	(0.73,1.4)	0.866135	0.99705		G	0	--	--	--	--
mt4216	4216	ND1	C	0.0494668	0.9661	(0.92,1)	0.211995	0.809463		C	0.0184355	1.0561	(0.9,1.2)	0.510834	0.99502		C	0.00448207	1.1922	(0.85,1.7)	0.302297	0.857932		C	0.185542	0.9619	(0.9,1)	0.22101	0.99477		C	0.015778	0.8563	(0.71,1)	0.0922908	0.709667		C	0.00740741	1.0432	(0.52,2.1)	0.905537	0.94384
mt4248	4248	ND1	C	0.104188	1.0028	(0.96,1)	0.892929	0.996492		C	0.00647733	1.1398	(0.87,1.5)	0.348005	0.99502		C	0.062251	1.0185	(0.93,1.1)	0.691467	0.954184		C	0.0168573	1.0755	(0.88,1.3)	0.478038	0.99477		C	0.350925	0.9898	(0.94,1)	0.67031	0.99705		--	0	--	--	--	--
mt4312	4312	tRNA	T	0.0133934	0.9372	(0.85,1)	0.194901	0.809463		T	0.0491968	0.9408	(0.85,1)	0.238869	0.99502		T	0	--	--	--	--		T	0.00060241	0.5683	(0.21,1.5)	0.25974	0.99477		T	0.00272035	1.0011	(0.65,1.5)	0.995856	0.99705		T	0	--	--	--	--
mt4336	4336	tRNA	C	0.00758452	0.9825	(0.86,1.1)	0.78784	0.959942		C	0.000998502	--	--	--	--		C	0	--	--	--	--		C	0.025286	0.8652	(0.74,1)	0.0636224	0.99477		C	0.00816105	1.314	(1,1.7)	0.0322733	0.709667		C	0	--	--	--	--
mt4363	4363	tRNA	C	0.00154182	0.9672	(0.73,1.3)	0.816809	0.973415		C	0.000498504	--	--	--	--		C	0.000498008	--	--	--	--		C	0.00361228	1.1908	(0.8,1.8)	0.393216	0.99477		C	0.00217628	0.7213	(0.45,1.2)	0.183768	0.837285		C	0	--	--	--	--
mt4386	4386	tRNA	C	0.0399589	0.9952	(0.94,1.1)	0.875364	0.99528		C	0.00199402	0.7717	(0.47,1.3)	0.300487	0.99502		C	0.151394	0.9966	(0.94,1.1)	0.913956	0.998511		C	0.000602047	--	--	--	--		C	0.00054407	0.5384	(0.21,1.4)	0.208899	0.87521		C	0.0037037	--	--	--	--
mt4491	4491	ND2	A	0.00745214	0.9977	(0.88,1.1)	0.972584	0.996492		A	0.00298954	1.2085	(0.81,1.8)	0.354436	0.99502		A	0.0234064	0.99	(0.86,1.1)	0.892128	0.998511		A	0.00240819	0.8169	(0.5,1.3)	0.419427	0.99477		A	0.000544366	--	--	--	--		A	0	--	--	--	--
mt4529	4529	ND2	T	0.00462606	0.9092	(0.77,1.1)	0.25541	0.823125		T	0.00149477	0.6031	(0.34,1.1)	0.0797732	0.980792		--	0	--	--	--	--		T	0.0180723	0.9257	(0.77,1.1)	0.402583	0.99477		T	0.0016331	1.0716	(0.61,1.9)	0.807337	0.99705		--	0	--	--	--	--
mt4561	4561	ND2	C	0.00604424	0.9754	(0.85,1.1)	0.733829	0.959942		C	0.0044955	1.1736	(0.85,1.6)	0.338085	0.99502		C	0.000498256	0.5979	(0.22,1.6)	0.305377	0.857932		C	0.0192655	0.9324	(0.78,1.1)	0.432823	0.99477		C	0.00272331	0.9979	(0.65,1.5)	0.99221	0.99705		C	0	--	--	--	--
mt4586	4586	ND2	C	0.0123839	0.9428	(0.85,1)	0.257064	0.823125		C	0.0458901	0.9409	(0.85,1)	0.256927	0.99502		--	0	--	--	--	--		C	0.0006035	0.5684	(0.21,1.5)	0.259775	0.99477		C	0.00217746	1.1817	(0.73,1.9)	0.497092	0.990359		--	0	--	--	--	--
mt4655	4655	ND2	A	0.0155527	1.0173	(0.93,1.1)	0.708957	0.959942		A	0.0323866	0.9444	(0.83,1.1)	0.363984	0.99502		A	0.0254364	1.1607	(1,1.3)	0.0360818	0.847922		A	0.00120482	0.5473	(0.27,1.1)	0.0907586	0.99477		A	0.00163221	0.7543	(0.43,1.3)	0.321283	0.944833		--	0	--	--	--	--
mt4715	4715	ND2	G	0.0449423	1.0532	(0.99,1.1)	0.0741493	0.784303		G	0.0029985	0.8633	(0.58,1.3)	0.472204	0.99502		G	0.0205205	1.1236	(0.96,1.3)	0.1414	0.857932		G	0.00444444	0.9303	(0.64,1.4)	0.704658	0.99477		G	0.161633	1.0522	(0.99,1.1)	0.106861	0.709667		--	0	--	--	--	--
mt4732	4732	ND2	G	0.00840771	1.0143	(0.9,1.1)	0.820219	0.973818		G	0	--	--	--	--		G	0.0264868	1.0691	(0.93,1.2)	0.338549	0.857932		G	0.00549786	0.6668	(0.48,0.92)	0.0152103	0.99477		G	0.00164745	--	--	--	--		G	0	--	--	--	--
mt4769	4769	ND2	A	0.0164482	0.9624	(0.87,1.1)	0.438965	0.923297		--	0	--	--	--	--		--	0	--	--	--	--		A	0.0216737	0.9578	(0.81,1.1)	0.609453	0.99477		A	0.00489663	0.9526	(0.69,1.3)	0.767602	0.99705		A	0.309701	0.9637	(0.85,1.1)	0.576262	0.82944
mt4820	4820	ND2	A	0.0704244	0.9386	(0.90,0.98)	0.00753413	0.784303		A	0.00453629	0.7515	(0.54,1)	0.0868434	0.980792		A	0.0438684	0.8745	(0.79,0.97)	0.0139746	0.819485		A	0.013245	0.9327	(0.75,1.2)	0.540296	0.99477		A	0.233079	0.9613	(0.91,1)	0.146329	0.789565		--	0	--	--	--	--
mt4824	4824	ND2	G	0.102109	0.999	(0.96,1)	0.96233	0.996492		G	0.00748877	1.031	(0.8,1.3)	0.814186	0.99502		G	0.0587649	1.0243	(0.93,1.1)	0.613937	0.948234		G	0.0156627	1.0322	(0.84,1.3)	0.767681	0.99477		G	0.346049	0.9882	(0.94,1)	0.623074	0.99705		--	0	--	--	--	--
mt4883	4883	ND2	T	0.107427	1.0186	(0.98,1.1)	0.366492	0.922046		T	0.00298954	--	--	--	--		T	0.336323	1.0061	(0.96,1.1)	0.797714	0.979737		T	0.00722456	1.2247	(0.92,1.6)	0.17279	0.99477		T	0.0778443	1.0329	(0.95,1.1)	0.450032	0.990359		--	0	--	--	--	--
mt4917	4917	ND2	G	0.0250546	0.9545	(0.89,1)	0.214112	0.809463		G	0.00548082	1.0769	(0.8,1.4)	0.624619	0.99502		G	0.000996016	0.9915	(0.49,2)	0.981356	0.998511		G	0.10241	0.9511	(0.88,1)	0.216378	0.99477		G	0.00652884	0.9028	(0.68,1.2)	0.47288	0.990359		--	0	--	--	--	--
mt4958	4958	ND2	G	0.0382886	1.0014	(0.94,1.1)	0.964202	0.996492		G	0.000498256	--	--	--	--		G	0.147484	1.0001	(0.94,1.1)	0.998511	0.998511		--	0	--	--	--	--		--	0	--	--	--	--		G	0.0037037	--	--	--	--
mt5096	5096	ND2	C	0.010414	0.9498	(0.85,1.1)	0.36124	0.922046		C	0.0378863	0.9448	(0.84,1.1)	0.331125	0.99502		--	0	--	--	--	--		--	0	--	--	--	--		C	0.0027248	1.0233	(0.66,1.6)	0.916777	0.99705		--	0	--	--	--	--
mt5108	5108	ND2	C	0.0191443	1.0451	(0.96,1.1)	0.294608	0.8427		C	0.00647733	1.1206	(0.85,1.5)	0.412807	0.99502		C	0.0652715	1.0348	(0.95,1.1)	0.450112	0.948234		C	0.00180614	1.175	(0.67,2.1)	0.576902	0.99477		C	0.00054407	0.5209	(0.2,1.4)	0.184456	0.837285		C	0.0037037	--	--	--	--
mt5147	5147	ND2	A	0.0500901	0.9959	(0.95,1)	0.87451	0.99528		A	0.0863273	0.984	(0.91,1.1)	0.685288	0.99502		A	0.048951	1.064	(0.96,1.2)	0.232505	0.857932		A	0.0566606	0.9952	(0.9,1.1)	0.927751	0.99477		A	0.0131076	0.8671	(0.71,1.1)	0.157262	0.831241		--	0	--	--	--	--
mt5178	5178	ND2	A	0.107326	1.0175	(0.98,1.1)	0.3963	0.923297		A	0.00298954	--	--	--	--		A	0.336989	1.0069	(0.96,1.1)	0.772958	0.97223		A	0.0060241	1.1574	(0.84,1.6)	0.372462	0.99477		A	0.0778443	1.0329	(0.95,1.1)	0.449746	0.990359		--	0	--	--	--	--
mt5267	5267	ND2	C	0.000642343	--	--	--	--		--	0	--	--	--	--		--	0	--	--	--	--		--	0	--	--	--	--		C	0.00272035	1.028	(0.67,1.6)	0.900192	0.99705		--	0	--	--	--	--
mt5331	5331	ND2	A	0.0132323	0.9125	(0.83,1)	0.0686769	0.784303		A	0.0498256	0.9177	(0.83,1)	0.0939497	0.980792		A	0	--	--	--	--		A	0	--	--	--	--		A	0.00163221	0.7685	(0.44,1.3)	0.353856	0.944833		A	0	--	--	--	--
mt5393	5393	ND2	C	0.0227419	1.0647	(0.99,1.1)	0.106863	0.784303		C	0.079721	1.0809	(1,1.2)	0.0590353	0.980792		--	0	--	--	--	--		C	0.00481638	1.0095	(0.71,1.4)	0.957471	0.99477		C	0.00489929	0.8556	(0.62,1.2)	0.342491	0.944833		--	0	--	--	--	--
mt5417	5417	ND2	A	0.0165788	0.9251	(0.85,1)	0.0848072	0.784303		A	0.000498256	--	--	--	--		A	0.0608479	0.9171	(0.84,1)	0.0645137	0.857932		A	0.00120409	1.0064	(0.5,2)	0.985554	0.99477		A	0.00217628	--	--	--	--		--	0	--	--	--	--
mt5460	5460	ND2	A	0.0519464	0.9807	(0.93,1)	0.445977	0.923297		A	0.0704296	0.9703	(0.89,1.1)	0.490234	0.99502		A	0.0559441	0.9876	(0.9,1.1)	0.797452	0.979737		A	0.0555556	0.9913	(0.89,1.1)	0.870327	0.99477		A	0.0294118	0.9953	(0.87,1.1)	0.944972	0.99705		A	0.0152672	0.7842	(0.48,1.3)	0.338367	0.82944
mt5465	5465	ND2	C	0.0412637	0.9219	(0.83,1)	0.149933	0.809463		C	0.00351053	0.9179	(0.63,1.3)	0.650663	0.99502		C	0.0235471	0.8818	(0.76,1)	0.0888402	0.857932		C	0.00542169	1.0734	(0.77,1.5)	0.679895	0.99477		C	0.00108992	--	--	--	--		T	0.944444	0.9081	(0.7,1.2)	0.470108	0.82944
mt5773	5773	tRNA	A	0.0312219	1.0367	(0.97,1.1)	0.27398	0.826373		A	0.0822123	0.9942	(0.92,1.1)	0.886418	0.99502		A	0.0144494	1.1275	(0.94,1.4)	0.201201	0.857932		A	0.0108368	1.0908	(0.86,1.4)	0.465843	0.99477		A	0.0168662	1.1167	(0.94,1.3)	0.215897	0.87521		--	0	--	--	--	--
mt5814	5814	tRNA	C	0.0138764	0.9097	(0.83,1)	0.0540229	0.784303		C	0.0503239	0.9142	(0.83,1)	0.0786928	0.980792		C	0	--	--	--	--		C	0.000602047	--	--	--	--		C	0.00326442	0.7643	(0.52,1.1)	0.181059	0.837285		C	0	--	--	--	--
mt5951	5951	CO1	G	0.0240576	0.9797	(0.91,1.1)	0.588175	0.959942		G	0.0856713	0.9874	(0.91,1.1)	0.750517	0.99502		G	0.00249004	0.6082	(0.39,0.94)	0.0267528	0.819485		G	0.00120409	0.9322	(0.46,1.9)	0.844285	0.99477		G	0.00489663	1.0675	(0.77,1.5)	0.691035	0.99705		--	0	--	--	--	--
mt6221	6221	CO1	C	0.0451838	0.9824	(0.93,1)	0.530164	0.959942		C	0.134428	0.9798	(0.92,1)	0.538164	0.99502		C	0.00498008	0.9044	(0.66,1.2)	0.526808	0.948234		C	0.026506	0.9219	(0.79,1.1)	0.28923	0.99477		C	0.0179641	1.1065	(0.93,1.3)	0.242697	0.908969		--	0	--	--	--	--
mt6253	6253	CO1	C	0.0150405	0.9342	(0.85,1)	0.144897	0.809463		C	0.0364635	0.8693	(0.77,0.98)	0.018708	0.980792		C	0.0104582	1.1276	(0.91,1.4)	0.27487	0.857932		C	0.00180614	0.5665	(0.32,1)	0.0493771	0.99477		C	0.0108814	1.0578	(0.85,1.3)	0.61094	0.99705		C	0	--	--	--	--
mt6261	6261	CO1	A	0.00539568	0.9497	(0.82,1.1)	0.503142	0.957114		A	0.00747384	0.8981	(0.7,1.2)	0.406412	0.99502		A	0.00249004	1.1132	(0.72,1.7)	0.633408	0.948234		A	0.00662252	0.9629	(0.72,1.3)	0.80233	0.99477		A	0.00598477	0.9564	(0.72,1.3)	0.763974	0.99705		A	0	--	--	--	--
mt6267	6267	CO1	A	0.00385753	0.929	(0.78,1.1)	0.419913	0.923297		A	0.0104895	0.8426	(0.68,1)	0.118282	0.980792		A	0	--	--	--	--		A	0.00421687	1.0727	(0.74,1.6)	0.710899	0.99477		A	0.00108814	--	--	--	--		A	0	--	--	--	--
mt6455	6455	CO1	T	0.0549846	0.9969	(0.95,1.1)	0.908995	0.996492		T	0.00199302	1.0128	(0.62,1.7)	0.959515	0.99502		T	0.207171	0.9957	(0.94,1.1)	0.876228	0.998511		T	0.00301023	1.0823	(0.7,1.7)	0.72378	0.99477		T	0.00054407	0.511	(0.19,1.3)	0.173778	0.837285		T	0.00740741	0.9615	(0.47,2)	0.914065	0.94384
mt6473	6473	CO1	T	0.058503	0.9573	(0.91,1)	0.101865	0.784303		T	0.00150075	--	--	--	--		--	0	--	--	--	--		T	0.0117429	0.8939	(0.7,1.1)	0.356896	0.99477		T	0.234811	0.9584	(0.91,1)	0.117946	0.730161		--	0	--	--	--	--
mt6480	6480	CO1	A	0.00308444	0.947	(0.78,1.2)	0.59363	0.959942		A	0.00897308	0.9594	(0.76,1.2)	0.726289	0.99502		A	0	--	--	--	--		A	0.000602047	--	--	--	--		A	0.00217628	0.9127	(0.56,1.5)	0.710297	0.99705		A	0.0037037	0.5725	(0.21,1.5)	0.267693	0.82944
mt6663	6663	CO1	G	0.0101555	0.9452	(0.85,1.1)	0.322276	0.865777		G	0.0343968	0.9521	(0.84,1.1)	0.422723	0.99502		G	0.000498008	--	--	--	--		G	0.001207	0.5805	(0.29,1.2)	0.124501	0.99477		G	0.00380849	0.9668	(0.67,1.4)	0.856073	0.99705		G	0	--	--	--	--
mt6719	6719	CO1	C	0.0370037	0.9454	(0.82,1.1)	0.439472	0.923297		C	0.00498256	0.8865	(0.65,1.2)	0.44723	0.99502		C	0.00348606	1.2404	(0.85,1.8)	0.257487	0.857932		C	0.0060241	0.8944	(0.65,1.2)	0.489355	0.99477		C	0.00326442	0.889	(0.6,1.3)	0.558906	0.99705		T	0.944444	0.9081	(0.7,1.2)	0.470108	0.82944
mt6827	6827	CO1	C	0.0251863	1.0501	(0.98,1.1)	0.187807	0.809463		C	0.0891878	1.0625	(0.98,1.1)	0.121334	0.980792		--	0	--	--	--	--		C	0.00481928	1.0129	(0.71,1.4)	0.942523	0.99477		C	0.00489929	0.8559	(0.62,1.2)	0.343314	0.944833		--	0	--	--	--	--
mt6905	6905	CO1	G	0.004411	0.8691	(0.73,1)	0.115059	0.784303		G	0.0005	0.5957	(0.22,1.6)	0.299737	0.99502		--	0	--	--	--	--		G	0.00304878	0.7304	(0.47,1.1)	0.160422	0.99477		G	0.000547645	0.543	(0.21,1.4)	0.213583	0.87521		G	0.1	0.9542	(0.78,1.2)	0.647541	0.82944
mt6982	6982	CO1	0	0	--	--	--	--		0	0	--	--	--	--		0	0	--	--	--	--		0	0	--	--	--	--		0	0	--	--	--	--		0	0	--	--	--	--
mt7028	7028	CO1	C	0.104073	1.0222	(0.98,1.1)	0.313901	0.865275		C	0.00896861	0.9525	(0.76,1.2)	0.681208	0.99502		C	0.000996016	1.0199	(0.5,2.1)	0.956195	0.998511		C	0.409036	1.0387	(0.99,1.1)	0.13105	0.99477		C	0.0587595	0.9589	(0.87,1.1)	0.395076	0.956305		C	0.0111111	1.1656	(0.66,2.1)	0.599187	0.82944
mt7055	7055	CO1	G	0.0485799	1.0076	(0.95,1.1)	0.784683	0.959942		G	0.170075	1.0107	(0.95,1.1)	0.720304	0.99502		--	0	--	--	--	--		G	0.0102348	0.9116	(0.72,1.2)	0.449197	0.99477		G	0.0108814	1.0021	(0.81,1.2)	0.98487	0.99705		--	0	--	--	--	--
mt7146	7146	CO1	G	0.0681497	0.9877	(0.94,1)	0.614597	0.959942		G	0.245142	0.9895	(0.94,1)	0.683473	0.99502		G	0.000498504	0.6022	(0.23,1.6)	0.311357	0.857932		G	0.00662651	0.9457	(0.7,1.3)	0.716366	0.99477		G	0.0141767	0.9761	(0.81,1.2)	0.802865	0.99705		--	0	--	--	--	--
mt7175	7175	CO1	C	0.0553985	0.9915	(0.94,1)	0.747692	0.959942		C	0.198104	0.9909	(0.94,1)	0.745494	0.99502		--	0	--	--	--	--		C	0.00542169	1.0266	(0.73,1.4)	0.878012	0.99477		C	0.0136017	0.9991	(0.82,1.2)	0.992598	0.99705		--	0	--	--	--	--
mt7196	7196	CO1	A	0.0469514	1.0655	(1,1.1)	0.0241504	0.784303		A	0.00450225	1.0641	(0.77,1.5)	0.711162	0.99502		A	0.0209163	1.1323	(0.97,1.3)	0.112528	0.857932		A	0.00541842	1.1636	(0.83,1.6)	0.370825	0.99477		A	0.166122	1.0519	(0.99,1.1)	0.100054	0.709667		--	0	--	--	--	--
mt7256	7256	CO1	T	0.153144	0.9902	(0.95,1)	0.633168	0.959942		C	0.550075	0.9896	(0.95,1)	0.639755	0.99502		T	0.000998004	0.6065	(0.3,1.2)	0.158014	0.857932		T	0.0150512	1.0021	(0.81,1.2)	0.984314	0.99477		T	0.0321526	0.9957	(0.88,1.1)	0.947013	0.99705		T	0.0037037	--	--	--	--
mt7274	7274	CO1	T	0.0524001	0.9802	(0.93,1)	0.463589	0.924576		T	0.187311	0.9796	(0.93,1)	0.474449	0.99502		--	0	--	--	--	--		T	0.00482218	0.9568	(0.67,1.4)	0.807572	0.99477		T	0.0137061	0.9996	(0.82,1.2)	0.99705	0.99705		--	0	--	--	--	--
mt7389	7389	CO1	C	0.0593678	1.003	(0.95,1.1)	0.906982	0.996492		C	0.196909	1.0098	(0.96,1.1)	0.729449	0.99502		C	0.0124564	0.9347	(0.77,1.1)	0.503686	0.948234		C	0.00602047	0.9775	(0.71,1.3)	0.886985	0.99477		C	0.0174102	0.9627	(0.81,1.1)	0.664561	0.99705		--	0	--	--	--	--
mt7476	7476	tRNA	T	0.00436793	0.9275	(0.78,1.1)	0.381263	0.923297		T	0.00149477	--	--	--	--		T	0	--	--	--	--		T	0.0156532	0.9256	(0.76,1.1)	0.433902	0.99477		T	0.00272035	0.8093	(0.53,1.2)	0.335812	0.944833		T	0	--	--	--	--
mt7521	7521	tRNA	A	0.154125	0.9984	(0.96,1)	0.938256	0.996492		G	0.549139	0.9908	(0.95,1)	0.682445	0.99502		A	0.00499501	1.0958	(0.8,1.5)	0.56465	0.948234		A	0.0199035	0.9321	(0.78,1.1)	0.442461	0.99477		A	0.0349727	1.0651	(0.94,1.2)	0.314234	0.944833		A	0.0037037	--	--	--	--
mt7771	7771	CO2	G	0.05537	0.9878	(0.94,1)	0.64325	0.959942		G	0.197808	0.9901	(0.94,1)	0.721899	0.99502		G	0.000498008	0.6047	(0.23,1.6)	0.316801	0.857932		G	0.00481638	0.9567	(0.67,1.4)	0.807107	0.99477		G	0.0136017	0.9991	(0.82,1.2)	0.992598	0.99705		--	0	--	--	--	--
mt7867	7867	CO2	T	0.0316602	1.0486	(0.98,1.1)	0.149401	0.809463		T	0.0886896	1.0597	(0.98,1.1)	0.139714	0.980792		T	0.0249252	1.0383	(0.9,1.2)	0.601122	0.948234		T	0.00484261	1.0124	(0.71,1.4)	0.944846	0.99477		T	0.00490463	0.8559	(0.62,1.2)	0.343485	0.944833		T	0.0037037	--	--	--	--
mt8027	8027	CO2	A	0.117352	0.9924	(0.96,1)	0.696447	0.959942		A	0.114656	0.9817	(0.92,1.1)	0.598447	0.99502		A	0.00149477	--	--	--	--		A	0.0192887	1.0241	(0.85,1.2)	0.805384	0.99477		A	0.352557	0.9902	(0.94,1)	0.681505	0.99705		--	0	--	--	--	--
mt8248	8248	CO2	G	0.0249389	1.0507	(0.98,1.1)	0.184575	0.809463		G	0.0878244	1.0604	(0.98,1.1)	0.136869	0.980792		G	0.000498256	--	--	--	--		G	0.00481638	1.0129	(0.71,1.4)	0.942821	0.99477		G	0.00489929	0.8558	(0.62,1.2)	0.343232	0.944833		--	0	--	--	--	--
mt8251	8251	CO2	A	0.021971	0.9349	(0.87,1)	0.0823402	0.784303		A	0.0189337	0.8754	(0.75,1)	0.104422	0.980792		A	0.0164343	0.9555	(0.8,1.1)	0.605691	0.948234		A	0.0524096	0.9252	(0.83,1)	0.158199	0.99477		A	0.00652884	1.0695	(0.81,1.4)	0.636884	0.99705		A	0.0037037	--	--	--	--
mt8414	8414	ATP8	T	0.0990736	1.0209	(0.98,1.1)	0.319739	0.865777		T	0.003003	--	--	--	--		T	0.304781	1.0098	(0.96,1.1)	0.688322	0.954184		T	0.00541842	1.2185	(0.87,1.7)	0.248217	0.99477		T	0.0779292	1.0324	(0.95,1.1)	0.456154	0.990359		--	0	--	--	--	--
mt8417	8417	ATP8	T	0.00102788	--	--	--	--		T	0.00348953	1.0901	(0.75,1.6)	0.648918	0.99502		T	0	--	--	--	--		T	0	--	--	--	--		T	0.00054407	--	--	--	--		T	0	--	--	--	--
mt8460	8460	ATP8	G	0.00385902	1.0232	(0.86,1.2)	0.801812	0.962781		G	0.011988	1.0569	(0.86,1.3)	0.59007	0.99502		G	0	--	--	--	--		G	0.00120482	0.5916	(0.3,1.2)	0.137967	0.99477		G	0.00217984	1.152	(0.71,1.9)	0.564987	0.99705		G	0	--	--	--	--
mt8468	8468	ATP8	T	0.0673695	0.9881	(0.94,1)	0.628623	0.959942		T	0.243257	0.9878	(0.94,1)	0.636556	0.99502		--	0	--	--	--	--		T	0.00722456	0.9126	(0.68,1.2)	0.533404	0.99477		T	0.0136017	1.0026	(0.83,1.2)	0.97908	0.99705		--	0	--	--	--	--
mt8478	8478	ATP8	T	0.0002574	--	--	--	--		T	0	--	--	--	--		T	0	--	--	--	--		T	0	--	--	--	--		T	0.00108932	--	--	--	--		T	0	--	--	--	--
mt8563	8563	ATP8	G	0.0102775	1.0899	(0.98,1.2)	0.128655	0.784303		G	0.000498256	--	--	--	--		G	0.0368526	1.0858	(0.97,1.2)	0.165284	0.857932		G	0.00120409	1.0755	(0.54,2.2)	0.83705	0.99477		G	0.00163221	1.1051	(0.63,1.9)	0.724903	0.99705		--	0	--	--	--	--
mt8618	8618	ATP6	C	0.0181327	1.0181	(0.94,1.1)	0.67634	0.959942		C	0.057	1.0032	(0.91,1.1)	0.94767	0.99502		C	0.00597907	1.1661	(0.88,1.6)	0.290275	0.857932		C	0.00240819	0.994	(0.61,1.6)	0.980869	0.99477		C	0.00598477	1.0477	(0.78,1.4)	0.753444	0.99705		--	0	--	--	--	--
mt8655	8655	ATP6	T	0.0680884	0.9928	(0.95,1)	0.767982	0.959942		T	0.246139	0.9919	(0.94,1)	0.755337	0.99502		--	0	--	--	--	--		T	0.00662252	0.945	(0.7,1.3)	0.712718	0.99477		T	0.0136017	1.0026	(0.83,1.2)	0.97908	0.99705		--	0	--	--	--	--
mt8684	8684	ATP6	T	0.00218481	1.2309	(0.97,1.6)	0.0866442	0.784303		T	0	--	--	--	--		T	0.0079721	1.2029	(0.94,1.5)	0.141497	0.857932		T	0.00060241	--	--	--	--		T	0	--	--	--	--		T	0	--	--	--	--
mt8697	8697	ATP6	A	0.0242899	0.9595	(0.89,1)	0.275292	0.826373		A	0.00647733	1.0653	(0.81,1.4)	0.64982	0.99502		A	0.00149402	1.1951	(0.67,2.1)	0.543813	0.948234		A	0.0983112	0.9535	(0.88,1)	0.249603	0.99477		A	0.0054407	0.9055	(0.67,1.2)	0.524702	0.99705		--	0	--	--	--	--
mt8701	8701	ATP6	G	0.488943	1.0259	(1,1.1)	0.10199	0.784303		A	0.944195	0.9455	(0.86,1)	0.25098	0.99502		A	0.642252	1.0232	(0.98,1.1)	0.327721	0.857932		G	0.0428485	1.024	(0.9,1.2)	0.721711	0.99477		G	0.294502	1.0518	(1,1.1)	0.0448722	0.709667		G	0.0259259	1.0939	(0.74,1.6)	0.648084	0.82944
mt8794	8794	ATP6	T	0.101529	1.0022	(0.96,1)	0.91679	0.996492		T	0.00548082	1.1566	(0.86,1.6)	0.337175	0.99502		T	0.0587942	1.0246	(0.93,1.1)	0.609801	0.948234		T	0.0162553	1.0604	(0.86,1.3)	0.578058	0.99477		T	0.345316	0.9885	(0.94,1)	0.631971	0.99705		--	0	--	--	--	--
mt8860	8860	ATP6	A	0.00347044	1.0512	(0.87,1.3)	0.604255	0.959942		A	0.00399202	1.1379	(0.8,1.6)	0.465339	0.99502		A	0	--	--	--	--		A	0.0108434	1.0175	(0.81,1.3)	0.883663	0.99477		A	0.00054407	--	--	--	--		A	0	--	--	--	--
mt8869	8869	ATP6	G	0.000514403	--	--	--	--		G	0.000499251	--	--	--	--		G	0	--	--	--	--		G	0.00180832	1.1377	(0.65,2)	0.654908	0.99477		G	0	--	--	--	--		G	0	--	--	--	--
mt8875	8875	ATP6	C	0.00181865	1.0633	(0.82,1.4)	0.645588	0.959942		C	0.00103413	--	--	--	--		C	0	--	--	--	--		C	0.00120482	0.5875	(0.29,1.2)	0.133202	0.99477		C	0.00545851	1.1146	(0.82,1.5)	0.485881	0.990359		C	0	--	--	--	--
mt8896	8896	ATP6	A	0.00282995	1.0098	(0.82,1.2)	0.927435	0.996492		A	0	--	--	--	--		A	0.00150075	--	--	--	--		A	0.000602047	--	--	--	--		A	0.00979859	0.9042	(0.72,1.1)	0.386771	0.948711		A	0	--	--	--	--
mt8923	8923	ATP6	0	0	--	--	--	--		0	0	--	--	--	--		0	0	--	--	--	--		0	0	--	--	--	--		0	0	--	--	--	--		0	0	--	--	--	--
mt8964	8964	ATP6	T	0.018509	0.9529	(0.88,1)	0.262197	0.824207		--	0	--	--	--	--		T	0.0697906	0.9611	(0.88,1)	0.366869	0.884248		T	0.000602047	0.6391	(0.24,1.7)	0.372649	0.99477		--	0	--	--	--	--		T	0.0111111	0.8781	(0.5,1.6)	0.65664	0.82944
mt9042	9042	ATP6	T	0.0134892	0.9421	(0.85,1)	0.230907	0.809463		T	0.0488291	0.9405	(0.85,1)	0.23678	0.99502		--	0	--	--	--	--		T	0.000602047	0.5681	(0.21,1.5)	0.25931	0.99477		T	0.00326442	1.0822	(0.73,1.6)	0.694333	0.99705		--	0	--	--	--	--
mt9098	9098	ATP6	C	0.00438088	0.9443	(0.8,1.1)	0.505136	0.957114		C	0.00199601	0.9982	(0.61,1.6)	0.994368	0.99502		C	0	--	--	--	--		C	0	--	--	--	--		C	0.0164835	0.9354	(0.78,1.1)	0.460028	0.990359		C	0	--	--	--	--
mt9123	9123	ATP6	A	0.0443559	0.9409	(0.85,1)	0.215718	0.809463		A	0.00398605	0.9792	(0.69,1.4)	0.905492	0.99502		A	0.0239282	0.8757	(0.76,1)	0.0696121	0.857932		A	0.0168776	0.9942	(0.82,1.2)	0.951716	0.99477		A	0.00326797	1.2658	(0.85,1.9)	0.240787	0.908969		G	0.944444	0.9081	(0.7,1.2)	0.470108	0.82944
mt9128	9128	ATP6	C	0.00102854	--	--	--	--		C	0.000499251	--	--	--	--		C	0.00149477	0.8634	(0.49,1.5)	0.612131	0.948234		C	0.000602047	--	--	--	--		C	0.00163221	1.0587	(0.61,1.8)	0.840584	0.99705		C	0	--	--	--	--
mt9142	9142	ATP6	A	0.000128518	--	--	--	--		A	0.000498753	--	--	--	--		A	0	--	--	--	--		A	0	--	--	--	--		A	0	--	--	--	--		A	0	--	--	--	--
mt9221	9221	CO3	G	0.0848547	0.9957	(0.95,1)	0.851611	0.991451		G	0.304586	0.9968	(0.95,1)	0.893725	0.99502		--	0	--	--	--	--		G	0.00842866	0.9781	(0.74,1.3)	0.873978	0.99477		G	0.0185488	0.9898	(0.84,1.2)	0.904335	0.99705		G	0.0037037	--	--	--	--
mt9296	9296	CO3	T	0.0128469	0.9861	(0.89,1.1)	0.783098	0.959942		--	0	--	--	--	--		T	0.0483068	0.9827	(0.89,1.1)	0.737423	0.963303		T	0.000602047	0.6391	(0.24,1.7)	0.372649	0.99477		T	0.00108814	--	--	--	--		--	0	--	--	--	--
mt9449	9449	CO3	T	0.0242993	1.0193	(0.95,1.1)	0.611653	0.959942		T	0.0812968	1.0009	(0.92,1.1)	0.98247	0.99502		--	0	--	--	--	--		T	0.00421941	0.8849	(0.61,1.3)	0.522441	0.99477		T	0.010343	1.2112	(0.97,1.5)	0.0925989	0.709667		--	0	--	--	--	--
mt9477	9477	CO3	A	0.0228792	0.9991	(0.93,1.1)	0.981867	0.996492		A	0.00896861	0.9902	(0.78,1.2)	0.933705	0.99502		A	0.00597907	0.9898	(0.74,1.3)	0.94348	0.998511		A	0.076506	0.9983	(0.91,1.1)	0.969995	0.99477		A	0.0103486	1.0819	(0.87,1.4)	0.488729	0.990359		A	0.00740741	0.5732	(0.28,1.2)	0.120991	0.82944
mt9540	9540	CO3	C	0.497751	1.0267	(1,1.1)	0.0947192	0.784303		T	0.953164	0.9595	(0.86,1.1)	0.435315	0.99502		T	0.660189	1.0186	(0.97,1.1)	0.437049	0.933696		C	0.0427969	1.0057	(0.88,1.1)	0.931813	0.99477		C	0.303047	1.0544	(1,1.1)	0.0339751	0.709667		C	0.0259259	1.0939	(0.74,1.6)	0.648084	0.82944
mt9682	9682	CO3	C	0.00324086	1.0341	(0.85,1.3)	0.737051	0.959942		C	0.00199402	--	--	--	--		C	0.000498753	0.6208	(0.23,1.7)	0.34226	0.857932		C	0.0018622	0.8548	(0.48,1.5)	0.587859	0.99477		C	0.00933041	1.0488	(0.83,1.3)	0.690567	0.99705		C	0	--	--	--	--
mt9698	9698	CO3	C	0.0253213	1.0335	(0.96,1.1)	0.37572	0.923297		C	0.00299103	0.9946	(0.67,1.5)	0.978723	0.99502		--	0	--	--	--	--		C	0.10241	1.0315	(0.95,1.1)	0.444364	0.99477		C	0.0114317	1.0705	(0.87,1.3)	0.527975	0.99705		--	0	--	--	--	--
mt9755	9755	CO3	A	0.0209431	0.9809	(0.91,1.1)	0.62772	0.959942		A	0.0523169	0.9575	(0.87,1.1)	0.386399	0.99502		A	0.0199203	1.0172	(0.87,1.2)	0.831399	0.985275		A	0.00662252	0.9893	(0.74,1.3)	0.943166	0.99477		A	0.00381056	1.1279	(0.78,1.6)	0.518017	0.99705		--	0	--	--	--	--
mt9804	9804	CO3	A	0.00372655	0.9435	(0.79,1.1)	0.530777	0.959942		A	0.00697906	0.8719	(0.67,1.1)	0.307207	0.99502		A	0.00348606	1.2184	(0.84,1.8)	0.29864	0.857932		A	0.00240964	0.8099	(0.5,1.3)	0.400312	0.99477		A	0.00163221	1.0551	(0.6,1.8)	0.850114	0.99705		A	0.0037037	0.668	(0.25,1.8)	0.424549	0.82944
mt9818	9818	CO3	T	0.0132391	0.9416	(0.85,1)	0.230829	0.809463		T	0.0483308	0.9451	(0.85,1)	0.278208	0.99502		--	0	--	--	--	--		T	0.000602047	0.5681	(0.21,1.5)	0.25931	0.99477		T	0.00272035	1.0011	(0.65,1.5)	0.995856	0.99705		--	0	--	--	--	--
mt9855	9855	CO3	G	0.000642756	--	--	--	--		G	0.00249252	0.9019	(0.58,1.4)	0.644251	0.99502		G	0	--	--	--	--		G	0	--	--	--	--		G	0	--	--	--	--		G	0	--	--	--	--
mt9903	9903	CO3	C	0.000128502	--	--	--	--		C	0	--	--	--	--		C	0.000498256	--	--	--	--		C	0	--	--	--	--		C	0	--	--	--	--		C	0	--	--	--	--
mt9950	9950	CO3	C	0.0810637	0.9816	(0.94,1)	0.39651	0.923297		C	0.0503239	1.0781	(0.98,1.2)	0.140595	0.980792		C	0.0358566	0.9819	(0.87,1.1)	0.761409	0.97223		C	0.012643	0.9505	(0.76,1.2)	0.659992	0.99477		C	0.237758	0.9564	(0.91,1)	0.0980686	0.709667		--	0	--	--	--	--
mt9966	9966	CO3	A	0.00552486	1.0585	(0.91,1.2)	0.45728	0.923297		A	0.0169492	1.0366	(0.88,1.2)	0.677248	0.99502		--	0	--	--	--	--		A	0.00481638	1.1229	(0.79,1.6)	0.512379	0.99477		A	0.00054407	--	--	--	--		A	0	--	--	--	--
mt10007	10007	tRNA	C	0.00218397	1.2678	(1,1.6)	0.0498933	0.784303		C	0.000498256	--	--	--	--		C	0.00498008	1.2314	(0.9,1.7)	0.190205	0.857932		C	0.00120409	1.0099	(0.51,2)	0.977684	0.99477		C	0.00217628	--	--	--	--		C	0	--	--	--	--
mt10031	10031	tRNA	C	0.00616808	0.9623	(0.83,1.1)	0.596166	0.959942		C	0.0194417	0.9111	(0.78,1.1)	0.25013	0.99502		C	0	--	--	--	--		C	0.000602047	0.5962	(0.22,1.6)	0.30062	0.99477		C	0.00435256	1.3515	(0.96,1.9)	0.0838023	0.709667		C	0	--	--	--	--
mt10034	10034	tRNA	C	0.00526925	0.9091	(0.78,1.1)	0.224296	0.809463		C	0.00299103	0.8499	(0.57,1.3)	0.425936	0.99502		C	0	--	--	--	--		C	0.0192655	0.9003	(0.76,1.1)	0.239635	0.99477		C	0.0016331	1.0713	(0.61,1.9)	0.80833	0.99705		C	0	--	--	--	--
mt10086	10086	ND3	G	0.0227448	1.0119	(0.94,1.1)	0.761767	0.959942		G	0.0797607	0.9906	(0.91,1.1)	0.818243	0.99502		--	0	--	--	--	--		G	0.00301023	0.8348	(0.53,1.3)	0.426418	0.99477		G	0.00653239	1.3843	(1,1.8)	0.0235556	0.709667		--	0	--	--	--	--
mt10115	10115	ND3	C	0.0849287	0.9964	(0.95,1)	0.875996	0.99528		C	0.305431	0.9962	(0.95,1)	0.875289	0.99502		--	0	--	--	--	--		C	0.00783133	1.0142	(0.76,1.3)	0.923084	0.99477		C	0.0184984	0.9907	(0.84,1.2)	0.912852	0.99705		C	0.0037037	--	--	--	--
mt10143	10143	ND3	A	0.0041269	0.9666	(0.81,1.2)	0.702047	0.959942		A	0.0145363	1.0182	(0.85,1.2)	0.847069	0.99502		A	0	--	--	--	--		A	0.00120773	0.6192	(0.31,1.2)	0.176368	0.99477		A	0.00054615	0.5448	(0.21,1.4)	0.216268	0.87521		A	0	--	--	--	--
mt10238	10238	ND3	C	0.0456885	0.9205	(0.84,1)	0.0783818	0.784303		C	0.00548082	0.9444	(0.7,1.3)	0.704796	0.99502		C	0.0174477	0.8461	(0.72,1)	0.0504371	0.857932		C	0.0290206	0.9297	(0.81,1.1)	0.321079	0.99477		C	0.00327332	1.2691	(0.86,1.9)	0.235579	0.908969		T	0.944444	0.9081	(0.7,1.2)	0.470108	0.82944
mt10321	10321	ND3	C	0.0214625	0.9574	(0.89,1)	0.276611	0.826373		C	0.0772297	0.9427	(0.87,1)	0.158549	0.980792		C	0	--	--	--	--		C	0.00120482	0.9695	(0.48,2)	0.930802	0.99477		C	0.00544662	1.1125	(0.82,1.5)	0.494268	0.990359		C	0	--	--	--	--
mt10345	10345	ND3	C	0.0128485	0.9765	(0.88,1.1)	0.640344	0.959942		C	0.00199402	1.0349	(0.63,1.7)	0.89106	0.99502		C	0.0473108	0.9799	(0.88,1.1)	0.700412	0.954184		C	0.000602047	0.5622	(0.21,1.5)	0.253503	0.99477		C	0	--	--	--	--		C	0	--	--	--	--
mt10373	10373	ND3	A	0.0200411	1.0173	(0.94,1.1)	0.675473	0.959942		A	0.0612855	1.0014	(0.91,1.1)	0.97564	0.99502		A	0.00747012	1.1106	(0.86,1.4)	0.419444	0.923416		A	0.00361228	0.7029	(0.47,1.1)	0.0854373	0.99477		A	0.00652884	1.2732	(0.96,1.7)	0.092342	0.709667		--	0	--	--	--	--
mt10398	10398	ND3	A	0.450199	0.9782	(0.95,1)	0.126721	0.784303		A	0.0483308	1.0534	(0.95,1.2)	0.318225	0.99502		A	0.294118	0.9719	(0.93,1)	0.246171	0.857932		G	0.784467	0.9963	(0.94,1.1)	0.902603	0.99477		G	0.680457	0.9571	(0.91,1)	0.0750074	0.709667		G	0.974074	0.9142	(0.62,1.3)	0.648084	0.82944
mt10400	10400	ND3	T	0.236972	1.0358	(1,1.1)	0.039928	0.784303		T	0.0165996	1.0271	(0.86,1.2)	0.761041	0.99502		C	0.658401	1.0199	(0.97,1.1)	0.408296	0.923416		T	0.015328	1.0705	(0.87,1.3)	0.511025	0.99477		T	0.250414	1.0567	(1,1.1)	0.0385763	0.709667		T	0.0223881	1.0273	(0.67,1.6)	0.900181	0.94384
mt10410	10410	tRNA	C	0.0173812	0.9826	(0.9,1.1)	0.688473	0.959942		C	0.00398605	1.0199	(0.72,1.4)	0.91131	0.99502		C	0.0551102	0.9678	(0.88,1.1)	0.504853	0.948234		C	0.00662252	1.1463	(0.85,1.5)	0.366414	0.99477		C	0.00327332	0.895	(0.6,1.3)	0.581255	0.99705		C	0	--	--	--	--
mt10463	10463	tRNA	C	0.0248104	0.9669	(0.9,1)	0.369717	0.922837		C	0.00848303	1.1213	(0.88,1.4)	0.347894	0.99502		C	0.00149402	1.1883	(0.67,2.1)	0.559397	0.948234		C	0.098252	0.953	(0.88,1)	0.244526	0.99477		C	0.0054407	0.9055	(0.67,1.2)	0.524702	0.99705		--	0	--	--	--	--
mt10550	10550	ND4L	G	0.0246787	1.0371	(0.96,1.1)	0.33342	0.880784		G	0.00299401	0.9941	(0.67,1.5)	0.976947	0.99502		--	0	--	--	--	--		G	0.0987357	1.0344	(0.95,1.1)	0.4117	0.99477		G	0.0119695	1.0876	(0.88,1.3)	0.425903	0.990359		--	0	--	--	--	--
mt10589	10589	ND4L	A	0.0178617	0.9769	(0.9,1.1)	0.588234	0.959942		A	0.0543641	0.9519	(0.86,1)	0.317131	0.99502		A	0.00298805	1.1767	(0.79,1.8)	0.427325	0.923416		A	0.0108368	1.0287	(0.82,1.3)	0.81127	0.99477		A	0.00326442	1.0696	(0.72,1.6)	0.737551	0.99705		--	0	--	--	--	--
mt10609	10609	ND4L	C	0.0131072	1.0815	(0.98,1.2)	0.121365	0.784303		C	0	--	--	--	--		C	0.0498256	1.0727	(0.97,1.2)	0.172142	0.857932		C	0	--	--	--	--		C	0.00054407	--	--	--	--		C	0.0037037	--	--	--	--
mt10688	10688	ND4L	A	0.0685354	0.9931	(0.95,1)	0.777421	0.959942		A	0.246261	0.9916	(0.94,1)	0.746115	0.99502		--	0	--	--	--	--		A	0.0066345	0.9456	(0.7,1.3)	0.715584	0.99477		A	0.0152339	1.0125	(0.84,1.2)	0.894123	0.99705		--	0	--	--	--	--
mt10810	10810	ND4	C	0.0687307	0.991	(0.94,1)	0.713002	0.959942		C	0.246139	0.9919	(0.94,1)	0.755337	0.99502		C	0.000996016	0.9896	(0.49,2)	0.976601	0.998511		C	0.00722456	0.9094	(0.68,1.2)	0.518884	0.99477		C	0.0146899	0.9939	(0.82,1.2)	0.94873	0.99705		--	0	--	--	--	--
mt10819	10819	ND4	G	0.049807	0.9789	(0.93,1)	0.441561	0.923297		G	0.18059	0.9754	(0.92,1)	0.391977	0.99502		--	0	--	--	--	--		G	0.00784077	0.9473	(0.72,1.2)	0.697687	0.99477		G	0.00708061	1.0827	(0.83,1.4)	0.562194	0.99705		--	0	--	--	--	--
mt10873	10873	ND4	C	0.49865	1.029	(1,1.1)	0.0706449	0.784303		T	0.953164	0.9595	(0.86,1.1)	0.435315	0.99502		T	0.662351	1.0211	(0.97,1.1)	0.377835	0.899149		C	0.0421941	1.0161	(0.89,1.2)	0.812283	0.99477		C	0.304419	1.0556	(1,1.1)	0.0302275	0.709667		C	0.0259259	1.0939	(0.74,1.6)	0.648084	0.82944
mt10915	10915	ND4	C	0.0193406	0.9168	(0.84,0.99)	0.0370497	0.784303		C	0.0532454	0.9206	(0.83,1)	0.0995199	0.980792		C	0.00599101	0.7749	(0.58,1)	0.0790084	0.857932		C	0.0090854	1.1566	(0.9,1.5)	0.261072	0.99477		C	0.00940265	0.8289	(0.66,1)	0.116896	0.730161		--	0	--	--	--	--
mt11016	11016	ND4	A	0.0109395	0.9853	(0.89,1.1)	0.785324	0.959942		A	0.00450225	1.0715	(0.77,1.5)	0.679384	0.99502		A	0.0144494	1.0845	(0.9,1.3)	0.387399	0.899149		A	0.00664251	0.9593	(0.71,1.3)	0.783703	0.99477		A	0.0195865	0.9096	(0.77,1.1)	0.252686	0.908969		--	0	--	--	--	--
mt11025	11025	ND4	C	0.00102894	--	--	--	--		C	0	--	--	--	--		C	0	--	--	--	--		C	0.00301023	1.3292	(0.86,2.1)	0.203069	0.99477		C	0.0016331	1.0988	(0.63,1.9)	0.739952	0.99705		C	0	--	--	--	--
mt11084	11084	ND4	G	0.0345981	1.0028	(0.94,1.1)	0.931459	0.996492		--	0	--	--	--	--		G	0.130175	0.9985	(0.94,1.1)	0.963845	0.998511		G	0.00301386	1.1136	(0.72,1.7)	0.630347	0.99477		G	0.000544959	--	--	--	--		G	0.00740741	1.0257	(0.51,2.1)	0.94384	0.94384
mt11176	11176	ND4	A	0.0166087	0.9559	(0.88,1)	0.313426	0.865275		A	0.0499002	0.9492	(0.86,1)	0.309296	0.99502		A	0.000501002	0.6127	(0.23,1.6)	0.328821	0.857932		A	0.00421941	1.0745	(0.74,1.6)	0.704486	0.99477		A	0.0114255	0.9742	(0.79,1.2)	0.808178	0.99705		--	0	--	--	--	--
mt11177	11177	ND4	T	0.0576824	0.9594	(0.91,1)	0.121143	0.784303		T	0.00149477	--	--	--	--		--	0	--	--	--	--		T	0.00963275	0.9069	(0.7,1.2)	0.467301	0.99477		T	0.23395	0.9597	(0.91,1)	0.128697	0.745384		--	0	--	--	--	--
mt11204	11204	ND4	C	0.00269888	0.9499	(0.77,1.2)	0.637053	0.959942		C	0.00299103	1.0061	(0.67,1.5)	0.976282	0.99502		C	0.000996016	0.5962	(0.3,1.2)	0.144748	0.857932		C	0.00482218	1.0032	(0.71,1.4)	0.985459	0.99477		C	0.00272035	1.003	(0.65,1.5)	0.989205	0.99705		C	0	--	--	--	--
mt11251	11251	ND4	G	0.0424001	0.9469	(0.89,1)	0.0674991	0.784303		G	0.00847035	1.0567	(0.83,1.3)	0.651187	0.99502		G	0.00149402	1.204	(0.66,2.2)	0.541651	0.948234		G	0.173494	0.9502	(0.89,1)	0.117076	0.99477		G	0.0119695	0.8211	(0.67,1)	0.0618606	0.709667		--	0	--	--	--	--
mt11253	11253	ND4	C	0.00398868	1.0776	(0.9,1.3)	0.406621	0.923297		C	0.000498504	--	--	--	--		C	0.000500501	0.6093	(0.23,1.6)	0.322648	0.857932		C	0.0162651	1.0584	(0.88,1.3)	0.558212	0.99477		C	0.00108814	--	--	--	--		C	0	--	--	--	--
mt11299	11299	ND4	C	0.02369	1.0254	(0.95,1.1)	0.511481	0.959406		C	0.00548082	0.866	(0.64,1.2)	0.341486	0.99502		--	0	--	--	--	--		C	0.0911854	1.0294	(0.95,1.1)	0.498791	0.99477		C	0.0125136	1.1036	(0.9,1.4)	0.339404	0.944833		--	0	--	--	--	--
mt11302	11302	ND4	T	0.0078386	1.0237	(0.9,1.2)	0.716964	0.959942		T	0.0293971	1.0122	(0.89,1.2)	0.854579	0.99502		--	0	--	--	--	--		T	0.000602773	--	--	--	--		T	0.00054407	--	--	--	--		--	0	--	--	--	--
mt11467	11467	ND4	G	0.0600026	1.0264	(0.98,1.1)	0.309117	0.865275		G	0.0154459	1.0164	(0.85,1.2)	0.857676	0.99502		--	0	--	--	--	--		G	0.224699	1.0187	(0.96,1.1)	0.531365	0.99477		G	0.0331882	1.1102	(0.98,1.3)	0.104779	0.709667		G	0.00740741	0.5732	(0.28,1.2)	0.120991	0.82944
mt11696	11696	ND4	A	0.00385852	1.0426	(0.87,1.2)	0.647762	0.959942		A	0.000498256	--	--	--	--		A	0.0109835	1.0958	(0.89,1.4)	0.394346	0.904111		A	0	--	--	--	--		A	0.00381264	0.8426	(0.58,1.2)	0.35832	0.946141		A	0	--	--	--	--
mt11719	11719	ND4	G	0.116052	1.023	(0.98,1.1)	0.28823	0.838246		G	0.00847035	1.1047	(0.87,1.4)	0.414715	0.99502		G	0.00149402	1.2035	(0.68,2.1)	0.525747	0.948234		G	0.455093	1.0306	(0.98,1.1)	0.224653	0.99477		G	0.0675014	0.9654	(0.88,1.1)	0.450265	0.990359		G	0.0148148	1.2758	(0.78,2.1)	0.335411	0.82944
mt11812	11812	ND4	G	0.0187588	0.9437	(0.87,1)	0.17488	0.809463		G	0.00597907	1.0305	(0.78,1.4)	0.836177	0.99502		G	0.000996016	0.9915	(0.49,2)	0.981356	0.998511		G	0.076506	0.9425	(0.86,1)	0.200063	0.99477		G	0.00272035	0.8145	(0.53,1.3)	0.351122	0.944833		--	0	--	--	--	--
mt11914	11914	ND4	A	0.140116	1.0121	(0.98,1)	0.479096	0.943314		A	0.276723	0.9835	(0.94,1)	0.504411	0.99502		A	0.0429356	0.9932	(0.89,1.1)	0.902212	0.998511		A	0.0519637	1.0509	(0.94,1.2)	0.375017	0.99477		A	0.19564	1.0446	(0.99,1.1)	0.131491	0.745384		A	0.0111111	1.2337	(0.7,2.2)	0.473218	0.82944
mt11944	11944	ND4	C	0.0887941	0.993	(0.95,1)	0.751928	0.959942		C	0.301314	0.9889	(0.94,1)	0.650029	0.99502		C	0.0174913	1.0105	(0.85,1.2)	0.902944	0.998511		C	0.00906892	1.0314	(0.79,1.3)	0.817703	0.99477		C	0.0218103	1.0012	(0.86,1.2)	0.987523	0.99705		C	0.0037037	--	--	--	--
mt11963	11963	ND4	A	0.00617363	1.0544	(0.92,1.2)	0.463746	0.924576		A	0.00598504	1.0748	(0.81,1.4)	0.618521	0.99502		A	0.0159363	1.0669	(0.9,1.3)	0.468346	0.948234		A	0.000603136	--	--	--	--		A	0.00163577	0.7522	(0.43,1.3)	0.316521	0.944833		A	0	--	--	--	--
mt11969	11969	ND4	A	0.00514139	0.9204	(0.79,1.1)	0.295078	0.8427		A	0.00399003	0.9934	(0.7,1.4)	0.970318	0.99502		A	0.0139512	0.8611	(0.71,1)	0.116782	0.857932		A	0.00120482	--	--	--	--		A	0.00108814	0.8885	(0.45,1.8)	0.733568	0.99705		A	0	--	--	--	--
mt11984	11984	ND4	C	0.0025697	0.9496	(0.76,1.2)	0.64376	0.959942		C	0.0079721	0.9983	(0.78,1.3)	0.989417	0.99502		C	0.000996016	0.5981	(0.3,1.2)	0.14688	0.857932		C	0.00120482	0.9817	(0.49,2)	0.958356	0.99477		C	0	--	--	--	--		C	0	--	--	--	--
mt12007	12007	ND4	A	0.104167	0.9897	(0.95,1)	0.618104	0.959942		A	0.0553892	0.9801	(0.89,1.1)	0.680985	0.99502		A	0.00498504	0.9088	(0.67,1.2)	0.547584	0.948234		A	0.0271084	1.0489	(0.9,1.2)	0.542001	0.99477		A	0.350763	0.9883	(0.94,1)	0.625182	0.99705		--	0	--	--	--	--
mt12236	12236	tRNA	A	0.0263462	0.9888	(0.92,1.1)	0.757779	0.959942		A	0.0957129	0.9907	(0.92,1.1)	0.804695	0.99502		--	0	--	--	--	--		A	0.00120409	1.0251	(0.51,2.1)	0.94438	0.99477		A	0.00544366	0.9128	(0.67,1.2)	0.5593	0.99705		A	0.0037037	--	--	--	--
mt12239	12239	tRNA	T	0.0349659	0.9317	(0.78,1.1)	0.428988	0.923297		T	0.002997	0.9761	(0.65,1.5)	0.905855	0.99502		T	0.000996016	0.5893	(0.29,1.2)	0.143328	0.857932		T	0.00421433	0.9309	(0.64,1.4)	0.712727	0.99477		T	0.00108814	--	--	--	--		C	0.944444	0.9081	(0.7,1.2)	0.470108	0.82944
mt12248	12248	tRNA	G	0.00809456	0.9394	(0.83,1.1)	0.325853	0.86803		G	0.0298954	0.9469	(0.83,1.1)	0.404668	0.99502		G	0.000498256	--	--	--	--		G	0	--	--	--	--		G	0.00108814	0.5375	(0.27,1.1)	0.0746737	0.709667		G	0	--	--	--	--
mt12308	12308	tRNA	G	0.0601311	1.0247	(0.97,1.1)	0.33916	0.888544		G	0.0154536	1.0162	(0.85,1.2)	0.859201	0.99502		--	0	--	--	--	--		G	0.225166	1.0168	(0.96,1.1)	0.572119	0.99477		G	0.0331882	1.1102	(0.98,1.3)	0.104779	0.709667		G	0.00740741	0.5732	(0.28,1.2)	0.120991	0.82944
mt12358	12358	ND5	G	0.013234	0.9031	(0.82,1)	0.0424267	0.784303		G	0.00149477	0.8372	(0.48,1.5)	0.538198	0.99502		G	0.0483308	0.9027	(0.82,1)	0.0497277	0.857932		G	0.00120409	1.0584	(0.53,2.1)	0.872531	0.99477		G	0.00054407	--	--	--	--		--	0	--	--	--	--
mt12372	12372	ND5	A	0.0717685	1.0076	(0.96,1.1)	0.743976	0.959942		A	0.017439	1.0465	(0.89,1.2)	0.593848	0.99502		A	0.04	0.8916	(0.8,1)	0.044816	0.857932		A	0.225301	1.021	(0.96,1.1)	0.481262	0.99477		A	0.0364527	1.1271	(1,1.3)	0.0516925	0.709667		A	0.00740741	0.5732	(0.28,1.2)	0.120991	0.82944
mt12397	12397	ND5	G	0.0027041	0.8975	(0.73,1.1)	0.320587	0.865777		G	0.00299103	1.004	(0.67,1.5)	0.984409	0.99502		G	0.00100402	0.9781	(0.49,2)	0.950275	0.998511		G	0.00301023	0.7557	(0.49,1.2)	0.210507	0.99477		G	0.00435493	0.8876	(0.63,1.2)	0.493691	0.990359		G	0	--	--	--	--
mt12406	12406	ND5	A	0.0178686	1.0398	(0.96,1.1)	0.364975	0.922046		A	0.0114599	0.8083	(0.66,0.99)	0.0424967	0.980792		A	0.0509236	1.0831	(0.98,1.2)	0.116597	0.857932		A	0.00120409	0.6291	(0.31,1.3)	0.189865	0.99477		A	0.00380849	1.136	(0.79,1.6)	0.494143	0.990359		A	0.0185185	--	--	--	--
mt12454	12454	ND5	A	0.00167074	1.0779	(0.82,1.4)	0.587933	0.959942		A	0.000498753	--	--	--	--		A	0	--	--	--	--		A	0.00481638	0.9978	(0.71,1.4)	0.99027	0.99477		A	0.00217746	1.1458	(0.71,1.9)	0.58138	0.99705		A	0	--	--	--	--
mt12519	12519	ND5	C	0.0253083	1.0469	(0.97,1.1)	0.21557	0.809463		C	0.0886896	1.0597	(0.98,1.1)	0.139714	0.980792		C	0.000498008	--	--	--	--		C	0.00541842	0.9583	(0.69,1.3)	0.799923	0.99477		C	0.00489663	0.8556	(0.62,1.2)	0.342268	0.944833		--	0	--	--	--	--
mt12542	12542	ND5	T	0.00102881	--	--	--	--		T	0.00349825	1.0909	(0.75,1.6)	0.646003	0.99502		T	0	--	--	--	--		T	0	--	--	--	--		T	0.000544366	--	--	--	--		T	0	--	--	--	--
mt12612	12612	ND5	G	0.0194362	0.945	(0.87,1)	0.17568	0.809463		G	0.00648056	0.9772	(0.74,1.3)	0.868763	0.99502		G	0.00348606	1.0674	(0.73,1.6)	0.733258	0.963303		G	0.0722087	0.9668	(0.88,1.1)	0.478617	0.99477		G	0.00653239	0.7004	(0.53,0.93)	0.0123059	0.709667		--	0	--	--	--	--
mt12633	12633	ND5	A	0.00505051	0.9734	(0.83,1.1)	0.737152	0.959942		A	0.000996512	--	--	--	--		--	0	--	--	--	--		A	0.0193004	0.9688	(0.81,1.2)	0.722959	0.99477		A	0.00272926	1.0088	(0.66,1.6)	0.968269	0.99705		--	0	--	--	--	--
mt12693	12693	ND5	G	0.0553842	0.9904	(0.94,1)	0.715196	0.959942		G	0.197309	0.9915	(0.94,1)	0.761128	0.99502		--	0	--	--	--	--		G	0.00541842	1.0107	(0.72,1.4)	0.950554	0.99477		G	0.0141612	0.9766	(0.81,1.2)	0.807273	0.99705		--	0	--	--	--	--
mt12705	12705	ND5	C	0.372993	0.9875	(0.96,1)	0.423488	0.923297		C	0.041498	1.0471	(0.94,1.2)	0.416004	0.99502		C	0.22061	0.9923	(0.94,1)	0.775716	0.97223		T	0.877724	1.0383	(0.96,1.1)	0.341262	0.99477		C	0.353038	0.9545	(0.91,1)	0.0556697	0.709667		T	0.974074	0.9142	(0.62,1.3)	0.648084	0.82944
mt12771	12771	ND5	A	0.0417738	1.0084	(0.95,1.1)	0.778379	0.959942		A	0.00597907	0.9144	(0.69,1.2)	0.537265	0.99502		A	0.148904	1.0024	(0.94,1.1)	0.938471	0.998511		A	0.00482218	1.1477	(0.81,1.6)	0.436646	0.99477		A	0.00217865	1.16	(0.72,1.9)	0.546226	0.99705		A	0.00740741	--	--	--	--
mt12811	12811	ND5	C	0.0199152	0.9784	(0.9,1.1)	0.593477	0.959942		--	0	--	--	--	--		C	0.0523169	0.9729	(0.88,1.1)	0.584975	0.948234		C	0.00361228	1.3184	(0.88,2)	0.176953	0.99477		C	0.023395	0.9567	(0.82,1.1)	0.559373	0.99705		C	0.0037037	0.5453	(0.2,1.5)	0.232255	0.82944
mt12820	12820	ND5	0	0	--	--	--	--		0	0	--	--	--	--		0	0	--	--	--	--		0	0	--	--	--	--		0	0	--	--	--	--		0	0	--	--	--	--
mt12937	12937	ND5	G	0.00141461	1.0489	(0.78,1.4)	0.751159	0.959942		G	0	--	--	--	--		G	0	--	--	--	--		G	0.00662651	1.0756	(0.8,1.4)	0.629933	0.99477		G	0	--	--	--	--		G	0	--	--	--	--
mt12940	12940	ND5	A	0.00270514	0.921	(0.74,1.1)	0.450456	0.923297		A	0.00199601	1.0223	(0.63,1.7)	0.92998	0.99502		A	0	--	--	--	--		A	0.00060423	0.6205	(0.23,1.7)	0.33917	0.99477		A	0.0071116	0.9506	(0.73,1.2)	0.711016	0.99705		A	0.0111111	0.8781	(0.5,1.6)	0.65664	0.82944
mt12950	12950	ND5	G	0.0023465	0.9685	(0.77,1.2)	0.785443	0.959942		G	0.00210305	1.0109	(0.62,1.7)	0.965399	0.99502		G	0.000498008	--	--	--	--		G	0.004828	0.9726	(0.69,1.4)	0.875342	0.99477		G	0.00272628	0.822	(0.53,1.3)	0.372612	0.946141		G	0	--	--	--	--
mt13105	13105	ND5	G	0.127621	0.9998	(0.96,1)	0.990316	0.999506		G	0.427786	0.9976	(0.95,1)	0.916914	0.99502		G	0.0184539	0.9604	(0.82,1.1)	0.627637	0.948234		G	0.0240964	0.9849	(0.84,1.2)	0.851192	0.99477		G	0.0321176	1.0492	(0.92,1.2)	0.461242	0.990359		--	0	--	--	--	--
mt13135	13135	ND5	A	0.00899627	1.016	(0.9,1.1)	0.790362	0.959942		A	0.0104686	0.8461	(0.68,1)	0.128081	0.980792		A	0.00697906	1.07	(0.82,1.4)	0.614458	0.948234		A	0.00361228	1.2023	(0.81,1.8)	0.367071	0.99477		A	0.015778	1.0996	(0.92,1.3)	0.30148	0.944833		A	0	--	--	--	--
mt13263	13263	ND5	G	0.0443217	1.0483	(0.99,1.1)	0.104221	0.784303		G	0.00597907	1.0086	(0.76,1.3)	0.953001	0.99502		G	0.0059761	0.9976	(0.75,1.3)	0.986687	0.998511		G	0.0102348	1.0034	(0.79,1.3)	0.977725	0.99477		G	0.165397	1.0541	(0.99,1.1)	0.0876233	0.709667		--	0	--	--	--	--
mt13276	13276	ND5	G	0.013234	0.9416	(0.85,1)	0.231138	0.809463		G	0.0483308	0.9448	(0.85,1)	0.275984	0.99502		--	0	--	--	--	--		G	0.000602047	0.5681	(0.21,1.5)	0.25931	0.99477		G	0.00272035	1.0011	(0.65,1.5)	0.995856	0.99705		--	0	--	--	--	--
mt13368	13368	ND5	A	0.0254499	0.9528	(0.89,1)	0.191244	0.809463		A	0.00946687	1.0451	(0.83,1.3)	0.702342	0.99502		A	0.00249004	1.0931	(0.7,1.7)	0.695707	0.954184		A	0.096988	0.9458	(0.87,1)	0.180134	0.99477		A	0.00708447	0.8626	(0.66,1.1)	0.28002	0.944833		--	0	--	--	--	--
mt13477	13477	ND5	A	0.00154381	0.7868	(0.59,1)	0.0960952	0.784303		A	0.00199402	0.6405	(0.39,1)	0.075785	0.980792		A	0.00348779	0.9145	(0.63,1.3)	0.637986	0.948234		A	0.000602047	0.6245	(0.23,1.7)	0.346265	0.99477		A	0	--	--	--	--		A	0	--	--	--	--
mt13485	13485	ND5	G	0.0294382	0.9769	(0.91,1)	0.501226	0.957114		G	0.107784	0.9659	(0.9,1)	0.335913	0.99502		--	0	--	--	--	--		G	0.00120482	0.9322	(0.46,1.9)	0.844177	0.99477		G	0.00598802	1.1429	(0.85,1.5)	0.369094	0.946141		--	0	--	--	--	--
mt13506	13506	ND5	T	0.0679861	0.9912	(0.94,1)	0.721001	0.959942		T	0.245763	0.9902	(0.94,1)	0.705313	0.99502		--	0	--	--	--	--		T	0.00662651	0.9439	(0.7,1.3)	0.707053	0.99477		T	0.0136017	1.0026	(0.83,1.2)	0.97908	0.99705		--	0	--	--	--	--
mt13590	13590	ND5	A	0.156238	0.974	(0.94,1)	0.114083	0.784303		A	0.312562	1.0029	(0.96,1.1)	0.905699	0.99502		A	0.0433267	0.888	(0.8,0.99)	0.0305127	0.819485		A	0.0210716	0.9606	(0.8,1.1)	0.661276	0.99477		A	0.253536	0.9605	(0.91,1)	0.125589	0.745384		A	0.0037037	--	--	--	--
mt13650	13650	ND5	T	0.152235	0.9919	(0.95,1)	0.696146	0.959942		C	0.54858	0.9906	(0.95,1)	0.673467	0.99502		--	0	--	--	--	--		T	0.0144491	0.9797	(0.79,1.2)	0.850768	0.99477		T	0.0321001	0.9957	(0.88,1.1)	0.947057	0.99705		T	0.0037037	--	--	--	--
mt13708	13708	ND5	A	0.0376655	1.0093	(0.95,1.1)	0.758714	0.959942		A	0.0154459	1.2409	(1,1.5)	0.0170614	0.980792		A	0.0329177	1.0277	(0.91,1.2)	0.66399	0.948234		A	0.1	0.9847	(0.91,1.1)	0.70668	0.99477		A	0.016331	0.9065	(0.76,1.1)	0.278068	0.944833		--	0	--	--	--	--
mt13780	13780	ND5	G	0.0047662	0.9003	(0.77,1.1)	0.203295	0.809463		G	0.00149701	0.6033	(0.34,1.1)	0.0799673	0.980792		G	0	--	--	--	--		G	0.0187198	0.9136	(0.76,1.1)	0.319412	0.99477		G	0.00163399	1.0713	(0.61,1.9)	0.80812	0.99705		G	0	--	--	--	--
mt13789	13789	ND5	C	0.0543842	1.011	(0.96,1.1)	0.684097	0.959942		C	0.196206	1.0097	(0.96,1.1)	0.730734	0.99502		--	0	--	--	--	--		C	0.0060241	0.9966	(0.73,1.4)	0.983332	0.99477		C	0.0108873	1.0026	(0.81,1.2)	0.98118	0.99705		--	0	--	--	--	--
mt13803	13803	ND5	G	0.0551414	0.9932	(0.94,1)	0.796783	0.960381		G	0.196909	0.9927	(0.94,1)	0.793212	0.99502		G	0.000498256	--	--	--	--		G	0.00482218	0.9582	(0.67,1.4)	0.81384	0.99477		G	0.0136017	0.9991	(0.82,1.2)	0.992598	0.99705		--	0	--	--	--	--
mt13880	13880	ND5	A	0.022482	1.0721	(0.99,1.2)	0.0749137	0.784303		A	0.079721	1.0809	(1,1.2)	0.0590353	0.980792		--	0	--	--	--	--		A	0.00361228	1.1893	(0.8,1.8)	0.39906	0.99477		A	0.00489663	0.8556	(0.62,1.2)	0.342268	0.944833		--	0	--	--	--	--
mt13886	13886	ND5	C	0.0172281	0.9849	(0.9,1.1)	0.731463	0.959942		C	0.0603792	0.9806	(0.89,1.1)	0.676684	0.99502		C	0.000498753	--	--	--	--		C	0.00180614	1.1866	(0.67,2.1)	0.553902	0.99477		C	0.00489663	0.9635	(0.7,1.3)	0.820902	0.99705		C	0	--	--	--	--
mt13924	13924	ND5	T	0.00783759	0.8925	(0.79,1)	0.0788417	0.784303		T	0.0294118	0.8917	(0.78,1)	0.0825331	0.980792		T	0	--	--	--	--		T	0	--	--	--	--		T	0.00108814	0.9324	(0.47,1.8)	0.840482	0.99705		T	0	--	--	--	--
mt13928	13928	ND5	C	0.0325821	1.0728	(1,1.1)	0.0291211	0.784303		C	0.046953	1.0781	(0.97,1.2)	0.15455	0.980792		C	0.0690345	1.0635	(0.98,1.2)	0.16361	0.857932		C	0.006035	1.1112	(0.81,1.5)	0.506043	0.99477		C	0.00489929	1.0867	(0.79,1.5)	0.613299	0.99705		C	0.00740741	--	--	--	--
mt13933	13933	ND5	G	0.00128568	1.0859	(0.8,1.5)	0.601262	0.959942		G	0.00149701	0.8391	(0.48,1.5)	0.543705	0.99502		G	0.000498504	--	--	--	--		G	0.00301205	1.1156	(0.72,1.7)	0.624974	0.99477		G	0.00054407	--	--	--	--		G	0	--	--	--	--
mt13934	13934	ND5	T	0.00926403	0.9338	(0.83,1)	0.246374	0.818332		T	0.0109835	0.8351	(0.68,1)	0.0925472	0.980792		T	0.00249128	0.9075	(0.58,1.4)	0.666424	0.948234		T	0.021148	1.0121	(0.86,1.2)	0.887634	0.99477		T	0.00435493	1.0366	(0.74,1.5)	0.836332	0.99705		T	0.00740741	0.5859	(0.29,1.2)	0.131594	0.82944
mt13942	13942	ND5	G	0.00141497	0.954	(0.71,1.3)	0.754327	0.959942		G	0	--	--	--	--		G	0.00547809	0.9514	(0.71,1.3)	0.741961	0.963303		G	0	--	--	--	--		G	0	--	--	--	--		G	0	--	--	--	--
mt13958	13958	ND5	C	0.0136528	1.0654	(0.97,1.2)	0.199434	0.809463		C	0.0447012	1.076	(0.97,1.2)	0.176674	0.99502		C	0	--	--	--	--		C	0.00180832	1.1976	(0.68,2.1)	0.53313	0.99477		C	0.00707676	0.9551	(0.73,1.2)	0.737572	0.99705		C	0.0037037	--	--	--	--
mt13966	13966	ND5	G	0.00566645	0.9649	(0.83,1.1)	0.635944	0.959942		G	0.00748877	0.9667	(0.75,1.2)	0.793654	0.99502		G	0	--	--	--	--		G	0.0164034	1.0128	(0.84,1.2)	0.895596	0.99477		G	0.00108814	0.5528	(0.28,1.1)	0.0878948	0.709667		G	0	--	--	--	--
mt13981	13981	ND5	T	0.00180041	1.0027	(0.77,1.3)	0.983917	0.996492		T	0.00697906	1.0048	(0.77,1.3)	0.971777	0.99502		T	0	--	--	--	--		T	0	--	--	--	--		T	0	--	--	--	--		T	0	--	--	--	--
mt14000	14000	ND5	A	0.0298047	0.9746	(0.91,1)	0.455553	0.923297		A	0.10862	0.966	(0.9,1)	0.335782	0.99502		--	0	--	--	--	--		A	0.00180614	0.802	(0.45,1.4)	0.447858	0.99477		A	0.00598477	1.1425	(0.85,1.5)	0.370387	0.946141		--	0	--	--	--	--
mt14022	14022	ND5	G	0.0354665	0.904	(0.76,1.1)	0.236296	0.809463		G	0.00448431	0.936	(0.67,1.3)	0.692525	0.99502		G	0.00149477	0.5992	(0.34,1.1)	0.0796323	0.857932		G	0.00541842	1.055	(0.76,1.5)	0.753789	0.99477		--	0	--	--	--	--		A	0.947955	0.8752	(0.67,1.1)	0.333273	0.82944
mt14053	14053	ND5	G	0.00218397	1.0635	(0.84,1.3)	0.611059	0.959942		G	0.00298954	1.0168	(0.68,1.5)	0.935073	0.99502		G	0.00199203	--	--	--	--		G	0.00120409	0.6321	(0.32,1.3)	0.194903	0.99477		G	0.00272035	0.9857	(0.64,1.5)	0.947748	0.99705		G	0	--	--	--	--
mt14059	14059	ND5	G	0.0133659	0.9265	(0.84,1)	0.126813	0.784303		G	0.0493519	0.9217	(0.83,1)	0.113664	0.980792		G	0	--	--	--	--		G	0.00060241	--	--	--	--		G	0.00217628	0.9209	(0.57,1.5)	0.737857	0.99705		G	0	--	--	--	--
mt14148	14148	ND5	G	0.0151199	0.9902	(0.9,1.1)	0.832999	0.983006		G	0.0370177	0.9791	(0.87,1.1)	0.727025	0.99502		G	0.0125188	1.0132	(0.83,1.2)	0.896284	0.998511		G	0.0078455	0.8794	(0.67,1.2)	0.355343	0.99477		G	0.00382514	1.1264	(0.78,1.6)	0.522293	0.99705		G	0	--	--	--	--
mt14167	14167	ND5	T	0.0242931	1.0458	(0.97,1.1)	0.236678	0.809463		T	0.00298954	0.9945	(0.67,1.5)	0.978661	0.99502		--	0	--	--	--	--		T	0.0971049	1.0454	(0.96,1.1)	0.284231	0.99477		T	0.0119695	1.0876	(0.88,1.3)	0.425903	0.990359		--	0	--	--	--	--
mt14178	14178	ND5	C	0.0582038	1.0023	(0.95,1.1)	0.928742	0.996492		C	0.198804	1.0066	(0.95,1.1)	0.814776	0.99502		C	0.00498008	1.0953	(0.8,1.5)	0.566777	0.948234		C	0.00782661	1.1215	(0.85,1.5)	0.414061	0.99477		C	0.016331	0.8727	(0.73,1)	0.132385	0.745384		C	0.0037037	0.6728	(0.25,1.8)	0.433804	0.82944
mt14212	14212	ND5	C	0.0485137	0.9896	(0.94,1)	0.708009	0.959942		C	0.174239	0.9846	(0.93,1)	0.598379	0.99502		--	0	--	--	--	--		C	0.00665054	1.0323	(0.77,1.4)	0.833791	0.99477		C	0.00925926	1.0326	(0.82,1.3)	0.789251	0.99705		--	0	--	--	--	--
mt14258	14258	ND5	A	0.000643418	0.7409	(0.48,1.1)	0.178662	0.809463		A	0.000499251	--	--	--	--		A	0	--	--	--	--		A	0.00241109	0.782	(0.48,1.3)	0.32547	0.99477		A	0	--	--	--	--		A	0	--	--	--	--
mt14284	14284	ND5	T	0.0170907	0.9733	(0.89,1.1)	0.543122	0.959942		T	0.0607872	0.9771	(0.89,1.1)	0.620216	0.99502		--	0	--	--	--	--		T	0.00120482	0.9828	(0.49,2)	0.96085	0.99477		T	0.00489929	0.9639	(0.7,1.3)	0.822699	0.99705		--	0	--	--	--	--
mt14318	14318	ND5	C	0.0427856	1.0545	(1,1.1)	0.0730844	0.784303		C	0.00448431	1.0659	(0.77,1.5)	0.703888	0.99502		C	0.0059761	0.9976	(0.75,1.3)	0.986687	0.998511		C	0.00542169	1.1665	(0.84,1.6)	0.363019	0.99477		C	0.164853	1.0522	(0.99,1.1)	0.0991945	0.709667		--	0	--	--	--	--
mt14364	14364	ND5	A	0.0466821	1.0076	(0.95,1.1)	0.785557	0.959942		A	0.00348779	0.9235	(0.64,1.3)	0.674054	0.99502		A	0.14741	1.0043	(0.94,1.1)	0.892034	0.998511		A	0.00842866	0.9186	(0.71,1.2)	0.527565	0.99477		A	0.0245902	1.048	(0.91,1.2)	0.526636	0.99705		A	0.0037037	--	--	--	--
mt14502	14502	ND5	C	0.00424164	1.046	(0.88,1.2)	0.605824	0.959942		C	0.000996512	--	--	--	--		C	0.0119581	0.9946	(0.81,1.2)	0.958234	0.998511		C	0.00301023	0.9237	(0.6,1.4)	0.722891	0.99477		C	0	--	--	--	--		C	0.00740741	--	--	--	--
mt14566	14566	ND5	G	0.0533282	0.9989	(0.95,1.1)	0.968317	0.996492		G	0.190429	1.001	(0.95,1.1)	0.971594	0.99502		--	0	--	--	--	--		G	0.00481638	0.9567	(0.67,1.4)	0.807107	0.99477		G	0.0136091	0.9994	(0.82,1.2)	0.994864	0.99705		--	0	--	--	--	--
mt14668	14668	ND5	T	0.100514	1.0191	(0.98,1.1)	0.36145	0.922046		T	0.00399003	1.29	(0.91,1.8)	0.150321	0.980792		T	0.308919	1.0081	(0.96,1.1)	0.738232	0.963303		T	0.0060241	1.1298	(0.82,1.6)	0.450545	0.99477		T	0.078346	1.036	(0.95,1.1)	0.407706	0.977738		--	0	--	--	--	--
mt14687	14687	tRNA	G	0	--	--	--	--		G	0	--	--	--	--		G	0	--	--	--	--		G	0	--	--	--	--		G	0	--	--	--	--		G	0	--	--	--	--
mt14766	14766	CYB	C	0.118524	1.0262	(0.98,1.1)	0.220198	0.809463		C	0.00998502	1.0721	(0.86,1.3)	0.536836	0.99502		C	0.00149402	1.2053	(0.68,2.1)	0.522165	0.948234		C	0.456627	1.0389	(0.99,1.1)	0.124899	0.99477		C	0.0745375	0.9622	(0.88,1)	0.386548	0.948711		C	0.0148148	1.2758	(0.78,2.1)	0.335411	0.82944
mt14769	14769	CYB	G	0.0392333	1.0476	(0.99,1.1)	0.127294	0.784303		G	0.137656	1.0619	(1,1.1)	0.0635066	0.980792		--	0	--	--	--	--		G	0.00783133	1.0273	(0.78,1.4)	0.847276	0.99477		G	0.00873839	0.8425	(0.66,1.1)	0.165586	0.837285		--	0	--	--	--	--
mt14783	14783	CYB	C	0.238713	1.0316	(1,1.1)	0.0678911	0.784303		C	0.0164187	1.0137	(0.85,1.2)	0.878754	0.99502		T	0.658647	1.0165	(0.97,1.1)	0.491645	0.948234		C	0.0162651	1.1113	(0.91,1.4)	0.289827	0.99477		C	0.251226	1.0485	(1,1.1)	0.0735751	0.709667		C	0.0223048	1.0247	(0.67,1.6)	0.90969	0.94384
mt14861	14861	CYB	A	0.00321461	1.135	(0.93,1.4)	0.204909	0.809463		A	0.00249252	0.8847	(0.57,1.4)	0.58442	0.99502		A	0.00647733	1.2183	(0.93,1.6)	0.15683	0.857932		A	0.00301386	1.0906	(0.7,1.7)	0.698548	0.99477		A	0.00108992	--	--	--	--		A	0	--	--	--	--
mt14905	14905	CYB	A	0.0508736	0.9991	(0.95,1.1)	0.973803	0.996492		A	0.107623	1.0411	(0.97,1.1)	0.263797	0.99502		A	0.000996016	0.9915	(0.49,2)	0.981356	0.998511		A	0.0969296	0.9453	(0.87,1)	0.175476	0.99477		A	0.00924918	1.0437	(0.82,1.3)	0.721798	0.99705		A	0	--	--	--	--
mt14911	14911	CYB	T	0.0289129	0.981	(0.92,1.1)	0.584105	0.959942		T	0.105184	0.9728	(0.91,1)	0.448866	0.99502		T	0.000498008	0.6095	(0.23,1.6)	0.323409	0.857932		T	0.00120409	0.9322	(0.46,1.9)	0.844285	0.99477		T	0.00598477	1.1425	(0.85,1.5)	0.370387	0.946141		--	0	--	--	--	--
mt14927	14927	CYB	G	0.00424328	0.8783	(0.74,1)	0.136388	0.809463		G	0	--	--	--	--		G	0.0119581	0.8456	(0.69,1)	0.103238	0.857932		G	0.00240964	1.0172	(0.62,1.7)	0.945761	0.99477		G	0.00272035	0.9717	(0.63,1.5)	0.896401	0.99705		G	0	--	--	--	--
mt14944	14944	CYB	T	0.00424001	1.1176	(0.94,1.3)	0.203595	0.809463		--	0	--	--	--	--		T	0.0164425	1.1109	(0.93,1.3)	0.232807	0.857932		--	0	--	--	--	--		--	0	--	--	--	--		--	0	--	--	--	--
mt14978	14978	CYB	G	0.000899627	--	--	--	--		G	0.000498504	--	--	--	--		G	0.000996512	1.0089	(0.5,2)	0.980095	0.998511		G	0.00240964	0.9873	(0.6,1.6)	0.959309	0.99477		G	0	--	--	--	--		G	0	--	--	--	--
mt14979	14979	CYB	C	0.017756	0.9452	(0.87,1)	0.199105	0.809463		C	0.000498753	--	--	--	--		C	0.0683292	0.9455	(0.87,1)	0.206166	0.857932		C	0	--	--	--	--		C	0	--	--	--	--		C	0	--	--	--	--
mt15038	15038	CYB	G	0.000128684	--	--	--	--		G	0	--	--	--	--		G	0	--	--	--	--		G	0.000602047	0.6069	(0.23,1.6)	0.317313	0.99477		G	0	--	--	--	--		G	0	--	--	--	--
mt15043	15043	CYB	A	0.247935	1.028	(1,1.1)	0.0924313	0.784303		A	0.0296185	1.0296	(0.9,1.2)	0.659368	0.99502		G	0.661508	1.0192	(0.97,1.1)	0.422565	0.923416		A	0.0412121	0.9435	(0.83,1.1)	0.351703	0.99477		A	0.252591	1.0569	(1,1.1)	0.0361911	0.709667		A	0.0222222	1.0193	(0.67,1.6)	0.929232	0.94384
mt15071	15071	CYB	C	0.00295478	1.016	(0.83,1.2)	0.879112	0.99528		C	0.000498256	--	--	--	--		C	0.00996016	0.9469	(0.76,1.2)	0.627555	0.948234		C	0.000602047	--	--	--	--		C	0.00054407	--	--	--	--		C	0	--	--	--	--
mt15074	15074	CYB	C	0.00193199	1.0131	(0.79,1.3)	0.919847	0.996492		C	0	--	--	--	--		C	0.00551102	0.8708	(0.65,1.2)	0.360992	0.881382		C	0.00060241	--	--	--	--		C	0.00163399	--	--	--	--		C	0	--	--	--	--
mt15077	15077	CYB	A	0.00192852	1.0359	(0.8,1.3)	0.784569	0.959942		A	0.00648703	1.1307	(0.86,1.5)	0.376676	0.99502		A	0.000498504	0.5859	(0.22,1.6)	0.286256	0.857932		A	0.00060241	0.5635	(0.21,1.5)	0.254074	0.99477		A	0	--	--	--	--		A	0	--	--	--	--
mt15110	15110	CYB	A	0.0310934	0.9977	(0.93,1.1)	0.944293	0.996492		A	0.106129	0.9794	(0.91,1.1)	0.564875	0.99502		A	0.000498256	--	--	--	--		A	0.00421433	1.2393	(0.86,1.8)	0.25667	0.99477		A	0.0103373	1.0357	(0.83,1.3)	0.75751	0.99705		A	0.00740741	--	--	--	--
mt15119	15119	CYB	A	0.0028325	1.0688	(0.87,1.3)	0.532039	0.959942		A	0.000499002	--	--	--	--		A	0.00250376	0.9088	(0.59,1.4)	0.670121	0.948234		A	0.000603136	--	--	--	--		A	0.00816105	1.1441	(0.89,1.5)	0.289841	0.944833		A	0	--	--	--	--
mt15136	15136	CYB	T	0.013234	0.9415	(0.85,1)	0.230545	0.809463		T	0.0483308	0.9451	(0.85,1)	0.278208	0.99502		--	0	--	--	--	--		T	0.000602047	0.5681	(0.21,1.5)	0.25931	0.99477		T	0.00272035	1.0011	(0.65,1.5)	0.995856	0.99705		--	0	--	--	--	--
mt15204	15204	CYB	C	0.000771307	--	--	--	--		C	0.00149477	--	--	--	--		C	0.000499251	0.5911	(0.22,1.6)	0.296268	0.857932		C	0.000602047	--	--	--	--		C	0.00054407	--	--	--	--		C	0	--	--	--	--
mt15218	15218	CYB	G	0.0138763	0.9726	(0.88,1.1)	0.569449	0.959942		G	0.00350701	0.9076	(0.63,1.3)	0.608365	0.99502		G	0.0241026	1.032	(0.89,1.2)	0.670825	0.948234		G	0.0313253	0.9233	(0.8,1.1)	0.257433	0.99477		G	0.000544959	--	--	--	--		G	0	--	--	--	--
mt15223	15223	CYB	T	0.00809353	0.9579	(0.85,1.1)	0.498906	0.957114		T	0.00298954	0.707	(0.47,1.1)	0.0900531	0.980792		T	0.0283865	0.9859	(0.86,1.1)	0.833515	0.985275		--	0	--	--	--	--		--	0	--	--	--	--		--	0	--	--	--	--
mt15236	15236	CYB	G	0.0120077	0.9318	(0.84,1)	0.177741	0.809463		G	0.00704225	1.1552	(0.89,1.5)	0.281304	0.99502		G	0.0351759	0.8593	(0.76,0.97)	0.0127777	0.819485		G	0.00060241	--	--	--	--		G	0.00435493	1.1622	(0.83,1.6)	0.387343	0.948711		G	0	--	--	--	--
mt15257	15257	CYB	A	0.00565335	0.9399	(0.81,1.1)	0.413325	0.923297		A	0.00149477	--	--	--	--		A	0	--	--	--	--		A	0.0204696	0.948	(0.8,1.1)	0.538023	0.99477		A	0.00381056	0.8301	(0.58,1.2)	0.316785	0.944833		A	0	--	--	--	--
mt15263	15263	CYB	T	0.00128568	1.1049	(0.81,1.5)	0.527298	0.959942		T	0.00448654	1.202	(0.87,1.7)	0.271328	0.99502		T	0	--	--	--	--		T	0.000602773	0.546	(0.2,1.5)	0.238438	0.99477		T	0	--	--	--	--		T	0	--	--	--	--
mt15301	15301	CYB	A	0.432575	1.0216	(0.99,1)	0.122105	0.784303		G	0.714072	1.001	(0.95,1.1)	0.967865	0.99502		G	0.661017	1.0167	(0.97,1.1)	0.484198	0.948234		A	0.0397351	0.998	(0.88,1.1)	0.976404	0.99477		A	0.291077	1.0532	(1,1.1)	0.0401634	0.709667		A	0.0259259	1.0939	(0.74,1.6)	0.648084	0.82944
mt15311	15311	CYB	G	0.0211973	1.0015	(0.93,1.1)	0.97016	0.996492		G	0.0747384	0.9771	(0.9,1.1)	0.58545	0.99502		--	0	--	--	--	--		G	0.00240819	0.9272	(0.57,1.5)	0.764785	0.99477		G	0.00598477	1.37	(1,1.8)	0.0348139	0.709667		--	0	--	--	--	--
mt15314	15314	CYB	A	0.00797941	0.8848	(0.78,1)	0.054446	0.784303		A	0.010005	0.7392	(0.59,0.92)	0.00709557	0.980792		A	0.0159521	1.0288	(0.86,1.2)	0.750471	0.96636		A	0.00361228	0.7193	(0.48,1.1)	0.107135	0.99477		A	0.00218103	0.9226	(0.57,1.5)	0.743595	0.99705		A	0	--	--	--	--
mt15323	15323	CYB	A	0.00886889	0.9914	(0.88,1.1)	0.887295	0.996492		A	0.00299103	0.8515	(0.57,1.3)	0.431197	0.99502		A	0.0249004	1.0378	(0.9,1.2)	0.605532	0.948234		A	0	--	--	--	--		A	0.00653951	0.8414	(0.64,1.1)	0.224637	0.895093		A	0.0037037	--	--	--	--
mt15326	15326	CYB	A	0.00411311	1.0318	(0.87,1.2)	0.722981	0.959942		A	0.00698254	1.0713	(0.82,1.4)	0.60711	0.99502		A	0	--	--	--	--		A	0.0108434	1.0178	(0.81,1.3)	0.88132	0.99477		A	0	--	--	--	--		A	0	--	--	--	--
mt15381	15381	CYB	T	0.000257169	--	--	--	--		T	0.000499251	--	--	--	--		T	0	--	--	--	--		T	0.00060241	--	--	--	--		T	0	--	--	--	--		T	0	--	--	--	--
mt15402	15402	CYB	T	0.00128535	0.9867	(0.72,1.3)	0.932193	0.996492		T	0	--	--	--	--		T	0.00398406	1.128	(0.8,1.6)	0.497321	0.948234		T	0.000602047	0.6371	(0.24,1.7)	0.367385	0.99477		T	0.000544662	0.5237	(0.2,1.4)	0.188033	0.837285		T	0	--	--	--	--
mt15431	15431	CYB	A	0.0141771	0.966	(0.88,1.1)	0.476097	0.943268		A	0.0489755	0.9509	(0.86,1.1)	0.331309	0.99502		A	0	--	--	--	--		A	0.00302297	1.089	(0.7,1.7)	0.703611	0.99477		A	0.00380849	1.1078	(0.77,1.6)	0.582241	0.99705		A	0	--	--	--	--
mt15452	15452	CYB	A	0.0427505	0.9485	(0.89,1)	0.0762423	0.784303		A	0.00896861	1.0271	(0.81,1.3)	0.821613	0.99502		A	0.00149402	1.204	(0.66,2.2)	0.541651	0.948234		A	0.175152	0.9544	(0.9,1)	0.152332	0.99477		A	0.0120153	0.822	(0.67,1)	0.0633839	0.709667		A	0	--	--	--	--
mt15479	15479	CYB	C	0.00218565	0.9605	(0.76,1.2)	0.73908	0.959942		C	0.000498753	--	--	--	--		C	0.00598205	0.9132	(0.69,1.2)	0.531196	0.948234		C	0.00180614	0.79	(0.45,1.4)	0.415011	0.99477		C	0.000544662	--	--	--	--		C	0	--	--	--	--
mt15497	15497	CYB	A	0.00927118	1.012	(0.9,1.1)	0.840361	0.983006		A	0.00349127	0.7956	(0.55,1.2)	0.228129	0.99502		A	0.0264868	1.0261	(0.89,1.2)	0.711944	0.960987		A	0.00603136	1.0157	(0.74,1.4)	0.921649	0.99477		A	0.000545256	--	--	--	--		A	0.00373134	--	--	--	--
mt15535	15535	CYB	T	0.0693909	0.9456	(0.9,0.99)	0.0192936	0.784303		T	0.00149477	--	--	--	--		T	0.0453187	0.8827	(0.79,0.98)	0.0200806	0.819485		T	0.0102348	0.9469	(0.73,1.2)	0.676995	0.99477		T	0.23366	0.9605	(0.91,1)	0.136832	0.754029		--	0	--	--	--	--
mt15607	15607	CYB	G	0.0242899	0.9383	(0.87,1)	0.0922968	0.784303		G	0.0079721	0.9563	(0.75,1.2)	0.72258	0.99502		G	0.000996016	0.9915	(0.49,2)	0.981356	0.998511		G	0.0952955	0.9417	(0.87,1)	0.15158	0.99477		G	0.00652884	0.8297	(0.63,1.1)	0.189478	0.837285		G	0.0037037	--	--	--	--
mt15629	15629	CYB	C	0.0176047	1.0166	(0.93,1.1)	0.706709	0.959942		C	0.0618146	1.0066	(0.92,1.1)	0.887703	0.99502		C	0.000498256	--	--	--	--		C	0.000602047	--	--	--	--		C	0.00598477	1.0522	(0.79,1.4)	0.732298	0.99705		--	0	--	--	--	--
mt15662	15662	CYB	G	0.00784667	1.0001	(0.88,1.1)	0.998387	0.999506		G	0	--	--	--	--		G	0.0284006	0.9858	(0.86,1.1)	0.831749	0.985275		G	0.00060241	0.6081	(0.23,1.6)	0.319077	0.99477		G	0.00163845	--	--	--	--		G	0	--	--	--	--
mt15672	15672	CYB	C	0.00169912	1.0258	(0.78,1.3)	0.853836	0.991451		C	0.00418191	0.8684	(0.61,1.2)	0.425522	0.99502		C	0	--	--	--	--		C	0.00241546	1.2551	(0.77,2.1)	0.364321	0.99477		C	0.000548246	--	--	--	--		C	0	--	--	--	--
mt15693	15693	CYB	C	0.00462725	0.9126	(0.77,1.1)	0.274863	0.826373		C	0.000998502	0.6276	(0.31,1.3)	0.189256	0.99502		C	0	--	--	--	--		C	0.0186635	0.9055	(0.76,1.1)	0.273168	0.99477		C	0.00163221	--	--	--	--		C	0	--	--	--	--
mt15746	15746	CYB	G	0.0358428	0.9089	(0.78,1.1)	0.237477	0.809463		G	0.00298954	0.9777	(0.65,1.5)	0.912238	0.99502		G	0.00498008	0.8151	(0.6,1.1)	0.198947	0.857932		G	0.00421433	0.9309	(0.64,1.4)	0.712727	0.99477		G	0.00054407	--	--	--	--		A	0.944444	0.9081	(0.7,1.2)	0.470108	0.82944
mt15758	15758	CYB	G	0.00836228	0.9981	(0.88,1.1)	0.976168	0.996492		G	0.0075	1.1027	(0.86,1.4)	0.450727	0.99502		G	0.0114599	0.9692	(0.79,1.2)	0.76609	0.97223		G	0.0120482	0.9546	(0.77,1.2)	0.67977	0.99477		G	0.00326797	1.0518	(0.71,1.6)	0.802441	0.99705		G	0.0037037	0.5725	(0.21,1.5)	0.267693	0.82944
mt15784	15784	CYB	C	0.0636002	0.9798	(0.93,1)	0.412857	0.923297		C	0.214357	0.9857	(0.93,1)	0.596055	0.99502		C	0.00747012	1.0435	(0.81,1.3)	0.742973	0.963303		C	0.0114389	0.8929	(0.71,1.1)	0.330609	0.99477		C	0.0168662	0.9422	(0.79,1.1)	0.50456	0.99705		--	0	--	--	--	--
mt15812	15812	CYB	A	0.0107941	0.9423	(0.85,1)	0.280459	0.826373		A	0.0313901	0.9566	(0.84,1.1)	0.488093	0.99502		A	0.000498504	--	--	--	--		A	0.00782661	0.9561	(0.73,1.3)	0.746768	0.99477		A	0.00380849	0.7248	(0.5,1)	0.0837879	0.709667		A	0	--	--	--	--
mt15824	15824	CYB	G	0.022739	1.0181	(0.94,1.1)	0.644263	0.959942		G	0.079721	0.997	(0.92,1.1)	0.942411	0.99502		--	0	--	--	--	--		G	0.00301023	0.8348	(0.53,1.3)	0.426418	0.99477		G	0.00652884	1.384	(1,1.8)	0.0236132	0.709667		--	0	--	--	--	--
mt15849	15849	CYB	T	0.0128717	1.088	(0.98,1.2)	0.0970264	0.784303		T	0.0446115	1.0885	(0.98,1.2)	0.117941	0.980792		T	0	--	--	--	--		T	0.00240964	1.0011	(0.61,1.6)	0.996459	0.996459		T	0.00326797	1.0889	(0.73,1.6)	0.672647	0.99705		T	0.0037037	--	--	--	--
mt15860	15860	CYB	G	0.00604579	1.0569	(0.92,1.2)	0.451304	0.923297		G	0.000498504	--	--	--	--		G	0.0225	1.0279	(0.89,1.2)	0.715629	0.960987		G	0	--	--	--	--		G	0	--	--	--	--		G	0.0037037	--	--	--	--
mt15889	15889	tRNA	C	0.00102934	--	--	--	--		C	0.003996	1.4889	(1.1,2.1)	0.0247316	0.980792		C	0	--	--	--	--		C	0	--	--	--	--		C	0	--	--	--	--		C	0	--	--	--	--
mt15904	15904	tRNA	T	0.00924974	1	(0.89,1.1)	0.999506	0.999506		T	0.00199302	0.9894	(0.61,1.6)	0.966093	0.99502		--	0	--	--	--	--		T	0.0288983	1.0008	(0.87,1.2)	0.991242	0.99477		T	0.0103373	0.991	(0.79,1.2)	0.936459	0.99705		T	0.0037037	--	--	--	--
mt15905	15905	tRNA	C	0.00836551	1.0368	(0.92,1.2)	0.563991	0.959942		C	0.0294264	1.0126	(0.89,1.2)	0.84938	0.99502		C	0	--	--	--	--		C	0.00242131	1.2967	(0.79,2.1)	0.299414	0.99477		C	0.00108873	--	--	--	--		C	0	--	--	--	--
mt15907	15907	tRNA	G	0.00179949	0.9864	(0.76,1.3)	0.918222	0.996492		G	0	--	--	--	--		G	0	--	--	--	--		G	0.00722456	1.0785	(0.81,1.4)	0.601539	0.99477		G	0.00108814	0.5305	(0.27,1)	0.0682837	0.709667		G	0	--	--	--	--
mt15924	15924	tRNA	G	0.024804	1.053	(0.98,1.1)	0.156694	0.809463		G	0.0204285	0.9211	(0.79,1.1)	0.297307	0.99502		G	0.0174477	1.203	(1,1.4)	0.0304519	0.819485		G	0.0548193	1.0234	(0.92,1.1)	0.66799	0.99477		G	0.0141458	1.191	(0.98,1.4)	0.0714029	0.709667		--	0	--	--	--	--
mt15928	15928	tRNA	A	0.0248142	0.939	(0.87,1)	0.0986713	0.784303		A	0.00662589	1.2372	(0.94,1.6)	0.126399	0.980792		A	0.00254842	0.7423	(0.48,1.2)	0.188659	0.857932		A	0.0967544	0.9285	(0.86,1)	0.0773862	0.99477		A	0.00584795	0.9071	(0.67,1.2)	0.532768	0.99705		A	0.00371747	0.5432	(0.2,1.5)	0.229308	0.82944
mt15939	15939	tRNA	T	0.000257865	--	--	--	--		T	0	--	--	--	--		T	0.00049975	--	--	--	--		T	0	--	--	--	--		T	0.000547645	0.5345	(0.2,1.4)	0.202342	0.873442		T	0	--	--	--	--
mt15940	15940	tRNA	C	0.0016716	--	--	--	--		C	0.00299103	1.2006	(0.8,1.8)	0.372101	0.99502		C	0.00299103	--	--	--	--		C	0.00060241	0.565	(0.21,1.5)	0.253202	0.99477		C	0	--	--	--	--		C	0	--	--	--	--
mt15941	15941	tRNA	C	0.00585328	1.0594	(0.92,1.2)	0.439555	0.923297		C	0.00677436	0.9601	(0.73,1.3)	0.769706	0.99502		C	0.0119522	1.1321	(0.93,1.4)	0.227766	0.857932		C	0	--	--	--	--		C	0.00436443	1.012	(0.72,1.4)	0.945498	0.99705		C	0	--	--	--	--
mt15942	15942	tRNA	C	0.0120854	0.9103	(0.82,1)	0.0732992	0.784303		C	0.0438465	0.9074	(0.82,1)	0.0743265	0.980792		C	0	--	--	--	--		C	0.00120627	0.5794	(0.29,1.2)	0.127676	0.99477		C	0.00217746	1.1497	(0.71,1.9)	0.571171	0.99705		C	0	--	--	--	--
mt15946	15946	tRNA	T	0.00128469	0.9845	(0.72,1.3)	0.920969	0.996492		T	0	--	--	--	--		T	0	--	--	--	--		T	0.00481638	1.0259	(0.72,1.5)	0.885412	0.99477		T	0.00108814	0.8848	(0.45,1.7)	0.72466	0.99705		T	0	--	--	--	--
mt15951	15951	tRNA	G	0.0043713	0.9347	(0.79,1.1)	0.431754	0.923297		G	0.000998502	--	--	--	--		G	0.0144422	0.917	(0.76,1.1)	0.355556	0.879534		G	0.00120482	0.5746	(0.29,1.1)	0.116736	0.99477		G	0.000544366	--	--	--	--		G	0	--	--	--	--
mt15978	15978	tRNA	T	0.0098959	1.0267	(0.92,1.1)	0.646248	0.959942		T	0.0299103	1.0042	(0.88,1.1)	0.949072	0.99502		T	0	--	--	--	--		T	0.00120409	--	--	--	--		T	0.00816105	1.0733	(0.84,1.4)	0.57815	0.99705		T	0	--	--	--	--
mt16017	16017	tRNA	C	0.00192951	1.1669	(0.91,1.5)	0.230811	0.809463		C	0.0045	1.1971	(0.86,1.7)	0.281406	0.99502		C	0.000997009	0.6062	(0.3,1.2)	0.157585	0.857932		C	0.00120482	--	--	--	--		C	0.00108814	--	--	--	--		C	0	--	--	--	--
mt16390	16390	control region	A	0.0993805	0.9963	(0.96,1)	0.858964	0.993765		A	0.305948	1.0026	(0.96,1.1)	0.916555	0.99502		A	0.0339321	0.97	(0.86,1.1)	0.621668	0.948234		A	0.0222892	0.9985	(0.85,1.2)	0.985588	0.99477		A	0.0311475	0.9823	(0.86,1.1)	0.786919	0.99705		A	0.0037037	--	--	--	--
*P value of log-additive model, adjusted for age, sex, maternal ethnicity and global ancestry PC1-PC5 in all sample's analysis, and adusted for age,sex and global ancestry PC1-PC5 in each maternal ethncity.
** Q value calculate using the FDR method for multiple testing correction (Storey and Tibshirani, 2003).
A MAF cutoff of 0.001 was used for all SNPs, with the exception of the Hawaiian group where a threshold of 0.005 was used instead.
