# Supplementary material for: No Association between the Mitochondrial Genome and Prostate Cancer Risk: The Multiethnic Cohort
Source: Oxford University Press journal article supplement (doi:10.1158/1055-9965.epi-16-0111), 2016-03-28
Supplement: 10559965epi160111-sup-161692_0_supp_3335486_31vrcj.xlsx [file 10559965epi160111-sup-161692_0_supp_3335486_31vrcj.xlsx]

## Sheet: Suppl. Table 2
Table S2. Associations between mitochondrial genome, OXPHOS pathway, genes and prostate cancer risk overall and by self-reported race/ethnicity
Maternal Ethnicity	Mitochondrial genome		Mitochondiral Oxidative phosphoralation pathway			Mitochondrial complex				Mitochondrial genes
	N	p	N	p	q (FDR)	Complex	N	p	q (FDR)	Gene	N	p	q (FDR)
All (4,086 cases/3,698 controls)	345	0.361	253	0.331	0.519	Complex I	137	0.29	0.853	MT-ND6	10	0.633294	0.758835
										MT-ND5	45	0.274027	0.718831
										MT-ND4L	4	0.471836	0.718831
										MT-ND4	24	0.297367	0.718831
										MT-ND3	9	0.711408	0.758835
										MT-ND2	23	0.0994782	0.718831
										MT-ND1	22	0.38571	0.718831
						Complex III	48	0.272	0.853	MT-CYB	48	0.272043	0.718831
						Complex IV	39	0.44	0.96	MT-CO3	14	0.920405	0.920405
										MT-CO2	5	0.159264	0.718831
										MT-CO1	20	0.346237	0.718831
						Complex V	22	0.6	0.96	MT-ATP8	5	0.698207	0.758835
										MT-ATP6	17	0.518017	0.718831
										rRNA	58	0.539123	0.718831
										tRNA	34	0.304427	0.718831
African American (1,004 cases/1,003 controls)	266	0.328	189	0.346	0.519	Complex I	110	0.3	0.853	MT-ND6	9	0.800643	0.800643
										MT-ND5	37	0.152639	0.613041
										MT-ND4L	3	0.396839	0.738022
										MT-ND4	20	0.754159	0.800643
										MT-ND3	8	0.713228	0.800643
										MT-ND2	18	0.170655	0.613041
										MT-ND1	16	0.726171	0.800643
						Complex III	37	0.526	0.96	MT-CYB	37	0.505698	0.738022
						Complex IV	32	0.32	0.853	MT-CO3	10	0.50739	0.738022
										MT-CO2	4	0.123558	0.613041
										MT-CO1	18	0.177542	0.613041
						Complex V	16	0.8	1	MT-ATP8	4	0.494746	0.738022
										MT-ATP6	12	0.64348	0.800643
										rRNA	44	0.227615	0.613041
										tRNA	27	0.424899	0.738022
Asian Americans (1,009 cases/999 controls)	188	0.089	93	0.051	0.306	Complex I	59	0.042	0.504	MT-ND6	3	1	1
										MT-ND5	12	0.059884	0.239536
										MT-ND4L	2	0.185478	0.370956
										MT-ND4	6	0.309214	0.503982
										MT-ND3	1	0.0501241	0.239536
										MT-ND2	5	0.314989	0.503982
										MT-ND1	7	0.103527	0.276072
						Complex III	17	0.04	0.504	MT-CYB	17	0.0399936	0.239536
						Complex IV	11	0.66	0.96	MT-CO3	5	0.881495	1
										MT-CO2	2	0.0899868	0.276072
										MT-CO1	4	0.145038	0.331515
						Complex V	5	0.3	0.853	MT-ATP8	0	1	1
										MT-ATP6	4	0.414215	0.552287
										rRNA	20	0.0458523	0.239536
										tRNA	9	0.401225	0.552287
European Americans (836 cases/825 controls)	282	0.999	201	0.994	0.994	Complex I	119	1	0.997	MT-ND6	10	0.834136	1
										MT-ND5	40	0.999886	1
										MT-ND4L	3	0.820611	1
										MT-ND4	22	0.906279	1
										MT-ND3	9	0.475472	1
										MT-ND2	18	0.933302	1
										MT-ND1	18	0.79715	1
						Complex III	42	0.743	0.991	MT-CYB	42	0.742691	1
						Complex IV	36	0.99	1	MT-CO3	12	1	1
										MT-CO2	5	0.508509	1
										MT-CO1	20	0.844183	1
						Complex V	18	0.93	1	MT-ATP8	3	0.406514	1
										MT-ATP6	15	0.997333	1
										rRNA	52	0.917966	1
										tRNA	28	0.370045	1
Latinos (1,099 cases/739 controls)	259	0.705	187	0.541	0.649	Complex I	113	0.59	0.96	MT-ND6	8	0.634561	1
										MT-ND5	37	0.56343	1
										MT-ND4L	4	0.845247	1
										MT-ND4	22	0.222527	0.890108
										MT-ND3	8	0.144809	0.772316
										MT-ND2	21	0.841011	1
										MT-ND1	18	0.365035	1
						Complex III	35	0.1	0.6	MT-CYB	35	0.100133	0.772316
						Complex IV	34	0.94	1	MT-CO3	11	0.593667	1
										MT-CO2	5	0.770404	1
										MT-CO1	19	1	1
						Complex V	17	0.95	1	MT-ATP8	5	0.800717	1
										MT-ATP6	13	0.934231	1
										rRNA	42	1	1
										tRNA	30	0.136899	0.772316
Native Hawaiians (138 cases/136 controls)	48	0.74	9	0.188	0.519	Complex I	8	0.07	0.56	MT-ND6	0	1	1
										MT-ND5	5	0.402062	1
										MT-ND4L	0	1	1
										MT-ND4	0	1	1
										MT-ND3	1	0.568228	1
										MT-ND2	1	0.570097	1
										MT-ND1	1	0.675383	1
						Complex III	2	0.62	0.96	MT-CYB	2	0.620195	1
						Complex IV	2	0.64	0.96	MT-CO3	3	0.714571	1
										MT-CO2	0	1	1
										MT-CO1	2	0.908495	1
						Complex V	1	0.68	0.96	MT-ATP8	0	1	1
										MT-ATP6	1	0.666191	1
										rRNA	1	0.695618	1
										tRNA	1	0.0830031	1
*Pathway and gene-based analysis were adjusted for age, maternal race/ethnicity and global ancestry PC1-PC5 in all sample analysis. P values were adjusted for age and global ancestry PC1-PC5 in each maternal ethnicity .
# Treshold of MAF to differentiate common and rare mtSNPs was 1% in each maternal ethnicities, exept in Hawaiian where it was set at 5%.
